# Supplementary material for: Comparative proteomic analysis reveals functional and evolutionary diversity in five Montivipera snake venoms
Source: Research Square preprint supplement (doi:10.21203/rs.3.rs-6915806/v1), 2025-09-02
Supplement: Supplementary file 1 [file cdad392c8a8405b335d8fab7.xlsx]

## Sheet: Montivipera proteomics Data
Table of Content
Species	Protocol	Link
M. bornmuelleri	Trypsin digestion	M. bornmuelleri_Trypsin
	MELD Digestion	M. bornmuelleri_MELD
M. bulgardaghica	Trypsin digestion	M. bulgardaghica_Trypsin
	MELD Digestion	M. bulgardaghica_MELD
M. xanthina	Trypsin digestion	M. xanthina_Trypsin
	MELD Digestion	M. xanthina_MELD
M. albiznona	Trypsin digestion	M. albizona_Trypsin
	MELD Digestion	M. albizona_MELD
M. raddei	Trypsin digestion	M. raddei_Trypsin
	MELD Digestion	M. raddei_MELD
M. lebetina	Trypsin digestion	M. lebetina_Trypsin
	MELD Digestion	M.lebetina_MELD

## Sheet: M. bornmuelleri_Trypsin
Protein ID	Protein description	Average Mass	# of matched peptides	# of Unique peptides	Protein score (-10LgP)	Proteoin coverage
tr|A0A1I9KNT0|A0A1I9KNT0_VIPAA	Metalloproteinase of class P-II MPII-1 OS=Vipera ammodytes ammodytes OX=8705 PE=2 SV=1	53479	27	7	269.77	23
tr|A0A6B7FRF2|A0A6B7FRF2_VIPAA	Amine oxidase OS=Vipera ammodytes ammodytes OX=8705 PE=2 SV=1	57103	45	7	262.96	36
tr|A0A6B7FMR4|A0A6B7FMR4_VIPAA	Metalloproteinase of class P-III MPIII-4 OS=Vipera ammodytes ammodytes OX=8705 PE=2 SV=1	68844	27	19	255.63	35
Q4VM08|VM3VA_MACLB	Zinc metalloproteinase-disintegrin-like VLAIP-A OS=Macrovipera lebetina OX=8709 PE=1 SV=1	68710	19	2	250.41	24
A0A6B7FMR5|VMMP3_VIPAA	Disintegrin-like/cysteine-rich protein MPIII-3 OS=Vipera ammodytes ammodytes OX=8705 PE=1 SV=1	36837	28	14	246.37	31
tr|A0A1I9KNR7|A0A1I9KNR7_VIPAA	Disintegrin Dis-1 OS=Vipera ammodytes ammodytes OX=8705 PE=2 SV=1	13997	22	12	239.8	64
tr|A0A1I9KNR4|A0A1I9KNR4_VIPAA	Disintegrin Dis-1 OS=Vipera ammodytes ammodytes OX=8705 PE=2 SV=1	13983	22	12	239.8	64
E5AJX2|VSP_VIPBN	Snake venom serine protease nikobin OS=Vipera berus nikolskii OX=1808362 GN=sp-VN PE=2 SV=1	28216	24	20	228.68	43
tr|A0A6B7FNN4|A0A6B7FNN4_VIPAA	Metalloproteinase of class P-III MPIII-5 OS=Vipera ammodytes ammodytes OX=8705 PE=2 SV=1	68346	23	7	221.17	24
R4NNL0|VMH3_VIPAA	Zinc metalloproteinase-disintegrin-like protein H3 OS=Vipera ammodytes ammodytes OX=8705 PE=1 SV=1	68546	23	7	221.17	24
tr|A0A1I9KNS3|A0A1I9KNS3_VIPAA	Metalloproteinase of class P-II MPII-3 OS=Vipera ammodytes ammodytes OX=8705 PE=2 SV=1	53069	22	7	220.91	21
tr|Q6A3B4|Q6A3B4_VIPAS	Ammodytin I2(B) variant OS=Vipera aspis atra OX=246182 PE=2 SV=1	15283	20	3	217.74	68
A8CG87|PA2A2_DABRR	Acidic phospholipase A2 Drk-a2 OS=Daboia russelii OX=8707 PE=2 SV=1	15586	18	2	214.56	38
A8CG78|PA2A2_DABSI	Acidic phospholipase A2 DsM-a2/DsM-a2' OS=Daboia siamensis OX=343250 PE=1 SV=1	15586	18	2	214.56	38
W8EFS0|V5NTD_MACLB	Snake venom 5'-nucleotidase (Fragment) OS=Macrovipera lebetina OX=8709 PE=1 SV=1	45031	21	7	210.64	42
tr|A0A1I9KNR6|A0A1I9KNR6_VIPAA	Metalloproteinase of class P-III MPIII-1 OS=Vipera ammodytes ammodytes OX=8705 PE=2 SV=1	68388	16	10	209.58	21
P82475|TXVE2_MACLB	Snake venom vascular endothelial growth factor toxin ICPP OS=Macrovipera lebetina OX=8709 PE=1 SV=2	12574	14	14	205.63	61
P0DW97|TXVE_DABPA	Snake venom vascular endothelial growth factor toxin OS=Daboia palaestinae OX=1170828 PE=1 SV=1	12590	14	14	205.63	61
tr|A0A194APV2|A0A194APV2_9SAUR	L-amino-acid oxidase OS=Agkistrodon piscivorus OX=8715 PE=3 SV=1	58647	21	2	204.95	18
P83253|DID1A_MACLB	Disintegrin lebein-1-alpha OS=Macrovipera lebetina OX=8709 PE=1 SV=2	12099	11	9	198.56	59
tr|E9JG34|E9JG34_ECHCS	Metalloproteinase OS=Echis carinatus sochureki OX=124223 PE=2 SV=1	69245	18	2	197.45	13
tr|A0A1I9KNL5|A0A1I9KNL5_VIPAA	Serine proteinase SP-2 OS=Vipera ammodytes ammodytes OX=8705 PE=2 SV=1	28885	16	11	186.07	25
tr|A0A0D3S0M2|A0A0D3S0M2_ATHSQ	phospholipase A2 OS=Atheris squamigera OX=110225 PE=2 SV=1	15711	10	3	181.44	22
tr|A0A6B7FMQ9|A0A6B7FMQ9_VIPAA	Phospholipase B-like OS=Vipera ammodytes ammodytes OX=8705 PE=2 SV=1	64310	14	14	177.56	21
E0Y418|VSP1_MACLB	Serine protease VLSP-1 OS=Macrovipera lebetina OX=8709 PE=2 SV=1	28702	13	12	176.77	32
tr|K9JBU0|K9JBU0_DABRR	Dabocetin alpha subunit OS=Daboia russelii russelii OX=31159 PE=2 SV=1	17493	12	2	175.07	34
tr|A0A6B7FRK6|A0A6B7FRK6_VIPAA	Metalloproteinase of class P-III MPIII-2 OS=Vipera ammodytes ammodytes OX=8705 PE=2 SV=1	69218	14	6	174.93	23
tr|A0A1J0CZM7|A0A1J0CZM7_VIPAA	Snaclec-7 OS=Vipera ammodytes ammodytes OX=8705 PE=2 SV=1	17285	9	4	163.45	39
tr|A0A1I9KNN1|A0A1I9KNN1_VIPAA	C-type lectin snaclec-3 OS=Vipera ammodytes ammodytes OX=8705 PE=2 SV=1	17398	10	3	163.38	29
tr|A0A1J0CZM6|A0A1J0CZM6_VIPAA	Snaclec-8 OS=Vipera ammodytes ammodytes OX=8705 PE=2 SV=1	17142	7	5	160.4	31
tr|A0A0B8RNS9|A0A0B8RNS9_BOIIR	Xaa-Pro aminopeptidase 2 OS=Boiga irregularis OX=92519 PE=3 SV=1	76736	8	8	160.37	10
tr|A0A1I9KNP6|A0A1I9KNP6_VIPAA	C-type lectin snaclec-1 OS=Vipera ammodytes ammodytes OX=8705 PE=2 SV=1	17626	6	2	158.82	32
tr|M9NCD2|M9NCD2_CERGO	Glutaminyl-peptide cyclotransferase OS=Cerrophidion godmani OX=44722 GN=QC-1 PE=2 SV=1	40415	7	7	151.14	14
tr|U3TBM3|U3TBM3_OVOOK	Glutaminyl-peptide cyclotransferase (Fragment) OS=Ovophis okinavensis OX=8769 PE=2 SV=1	40742	7	7	151.14	14
tr|M9NCI9|M9NCI9_TRIGS	Glutaminyl-peptide cyclotransferase OS=Trimeresurus gracilis OX=109781 GN=QC PE=2 SV=1	42295	7	7	151.14	14
tr|M9NCI8|M9NCI8_CROAT	Glutaminyl-peptide cyclotransferase OS=Crotalus atrox OX=8730 GN=QC PE=2 SV=1	42299	7	7	151.14	14
tr|J3S3V2|J3S3V2_CROAD	Glutaminyl-peptide cyclotransferase OS=Crotalus adamanteus OX=8729 PE=2 SV=1	42354	7	7	151.14	14
tr|A0A1W7RH88|A0A1W7RH88_AGKCO	Glutaminyl-peptide cyclotransferase OS=Agkistrodon contortrix contortrix OX=8713 PE=3 SV=1	42352	7	7	151.14	14
tr|A0A0K8S0L7|A0A0K8S0L7_CROHD	Glutaminyl-peptide cyclotransferase OS=Crotalus horridus OX=35024 PE=3 SV=1	42370	7	7	151.14	14
Q90YA8|QPCT_GLOBL	Glutaminyl-peptide cyclotransferase OS=Gloydius blomhoffii OX=242054 GN=QPCT PE=2 SV=1	42267	7	7	151.14	14
tr|T1DH29|T1DH29_CROHD	Glutaminyl-peptide cyclotransferase OS=Crotalus horridus OX=35024 PE=2 SV=1	42369	7	7	151.14	14
tr|M9NCD3|M9NCD3_SISTE	Glutaminyl-peptide cyclotransferase OS=Sistrurus tergeminus OX=8757 GN=QC PE=2 SV=1	42297	7	7	151.14	14
tr|U3TDL2|U3TDL2_OVOOK	Glutaminyl-peptide cyclotransferase (Fragment) OS=Ovophis okinavensis OX=8769 PE=2 SV=1	42400	7	7	151.14	14
tr|U3FZH0|U3FZH0_MICFL	Glutaminyl-peptide cyclotransferase OS=Micrurus fulvius OX=8637 PE=2 SV=1	42150	7	7	151.14	14
Q9YIB5|QPCT_BOTJA	Glutaminyl-peptide cyclotransferase OS=Bothrops jararaca OX=8724 GN=QPCT PE=2 SV=1	42204	7	7	151.14	14
Q98995|VM2L2_MACLB	Zinc metalloproteinase/disintegrin OS=Macrovipera lebetina OX=8709 PE=1 SV=1	53480	7	3	149.18	4
B4XT06|SLB7_MACLB	Snaclec B7 (Fragment) OS=Macrovipera lebetina OX=8709 PE=2 SV=1	15036	7	6	145.27	22
W8E7D1|PDE_MACLB	Venom phosphodiesterase OS=Macrovipera lebetina OX=8709 PE=1 SV=1	96181	6	5	142.1	8
tr|K9JBU4|K9JBU4_DABSI	p68 beta subunit OS=Daboia siamensis OX=343250 PE=2 SV=1	16910	6	4	140.9	39
tr|K9JCR4|K9JCR4_DABRR	p68 beta subunit OS=Daboia russelii limitis OX=338883 PE=2 SV=1	16910	6	4	140.9	39
tr|K9JDF6|K9JDF6_DABSI	p31 beta subunit OS=Daboia siamensis OX=343250 PE=2 SV=1	17338	7	7	139.39	34
tr|K9JBV3|K9JBV3_DABRR	p31 beta subunit OS=Daboia russelii limitis OX=338883 PE=2 SV=1	17252	7	7	139.39	34
tr|K9JDK6|K9JDK6_DABRR	p31 beta subunit OS=Daboia russelii russelii OX=31159 PE=2 SV=1	17378	7	7	139.39	34
A0A0B4U9L8|VMF1_VIPAA	Zinc metalloproteinase-disintegrin-like protein F1 OS=Vipera ammodytes ammodytes OX=8705 PE=1 SV=1	68745	8	2	134.46	10
Q71QH5|VSP08_TRIST	Snake venom serine protease KN8 OS=Trimeresurus stejnegeri OX=39682 PE=2 SV=1	28176	6	5	128.56	9
P25428|NGFV_MACLB	Venom nerve growth factor OS=Macrovipera lebetina OX=8709 PE=1 SV=2	27318	3	3	125.73	13
tr|A0A6B7FPT6|A0A6B7FPT6_VIPAA	Vascular nerve growth factor OS=Vipera ammodytes ammodytes OX=8705 PE=2 SV=1	26649	3	3	125.73	13
tr|V9I168|V9I168_VIPUR	Venom nerve growth factor OS=Vipera ursinii OX=103942 PE=2 SV=1	27284	3	3	125.73	13
tr|A0A081DUA8|A0A081DUA8_ECHCO	Nerve growth factor a OS=Echis coloratus OX=64175 PE=2 SV=1	27186	3	3	125.73	13
tr|A0A6G5ZVU9|A0A6G5ZVU9_VIPAN	Nerve growth factor 1 OS=Vipera anatolica senliki OX=2604287 PE=2 SV=1	27325	3	3	125.73	13
tr|A0A098LWS4|A0A098LWS4_PYTRG	Amine oxidase OS=Python regius OX=51751 PE=2 SV=1	57250	5	2	125.52	8
tr|A0A1I9KNR5|A0A1I9KNR5_VIPAA	Serine proteinase SP-5 (Fragment) OS=Vipera ammodytes ammodytes OX=8705 PE=2 SV=1	25253	7	3	110.74	26
Q7LZ09|LEB_MACLB	Lebetin-2-alpha OS=Macrovipera lebetina OX=8709 PE=1 SV=1	3945	5	3	109.82	63
tr|E9JG53|E9JG53_ECHCS	Metalloproteinase (Fragment) OS=Echis carinatus sochureki OX=124223 PE=2 SV=1	27821	4	4	107.89	6
tr|E9JG44|E9JG44_ECHCS	Metalloproteinase (Fragment) OS=Echis carinatus sochureki OX=124223 PE=2 SV=1	29963	4	4	107.89	6
tr|T2HS00|T2HS00_PROFL	Prosaposin OS=Protobothrops flavoviridis OX=88087 PE=2 SV=1	58564	3	3	102.27	5
tr|Q4JCR9|Q4JCR9_BITAR	Disintegrin isoform Dc-1 (Fragment) OS=Bitis arietans OX=8692 PE=2 SV=1	11943	3	3	99.75	46
P17497|VM2_BITAR	Disintegrin bitistatin OS=Bitis arietans OX=8692 PE=1 SV=1	9004	3	3	99.75	60
tr|J3S3W1|J3S3W1_CROAD	Cadam10_SVMPIII-3 OS=Crotalus adamanteus OX=8729 PE=2 SV=1	67329	4	2	99.57	3
tr|J3SDW5|J3SDW5_CROAD	Metalloproteinase (Type III) 1a OS=Crotalus adamanteus OX=8729 PE=2 SV=1	67330	4	2	99.57	3
tr|A0A194ARX9|A0A194ARX9_SISMB	Metalloproteinase type III 10 OS=Sistrurus miliarius barbouri OX=8759 PE=4 SV=1	67425	4	2	99.57	3
tr|A0A194ARK5|A0A194ARK5_SISTE	Metalloproteinase type III 11a OS=Sistrurus tergeminus OX=8757 PE=4 SV=1	67312	4	2	99.57	3
C0HKZ6|SLMA_MACLB	Snaclec macrovipecetin subunit alpha OS=Macrovipera lebetina OX=8709 PE=1 SV=1	15418	4	4	93.28	36
P81882|VSPT1_BOTJA	Thrombin-like enzyme TL-BJ 1 (Fragment) OS=Bothrops jararaca OX=8724 PE=1 SV=1	2102	5	2	92.75	89
tr|R4G317|R4G317_9SAUR	KP-Pse-7 OS=Pseudonaja modesta OX=340912 PE=2 SV=1	9171	2	2	86.37	18
Q90W98|VKT4_PSETT	Kunitz-type serine protease inhibitor textilinin-4 OS=Pseudonaja textilis textilis OX=169397 PE=2 SV=1	8983	2	2	86.37	18
tr|R4FK61|R4FK61_9SAUR	KP-Pse-5 OS=Pseudonaja modesta OX=340912 PE=2 SV=1	9212	2	2	86.37	18
Q71RR0|SL9B3_TRIST	Snaclec coagulation factor IX/factor X-binding protein subunit B3 (Fragment) OS=Trimeresurus stejnegeri OX=39682 PE=2 SV=1	15019	2	2	70.98	17
Q9PT41|VSPF5_MACLB	Factor V activator OS=Macrovipera lebetina OX=8709 PE=1 SV=1	28595	2	2	63.93	11
tr|J3RZT5|J3RZT5_CROAD	Keratin type I cytoskeletal 19 OS=Crotalus adamanteus OX=8729 PE=2 SV=1	41813	2	2	58.89	5
tr|A0A2D4G9B5|A0A2D4G9B5_MICCO	C-type lectin domain-containing protein (Fragment) OS=Micrurus corallinus OX=54390 PE=3 SV=1	11772	2	2	57.38	10

## Sheet: M. bornmuelleri_MELD
Protein ID	Protein description	Average Mass	# of matched peptides	# of Unique peptides	Protein score (-10LgP)	Proteoin coverage
A0A6B7FMR5|VMMP3_VIPAA	Disintegrin-like/cysteine-rich protein MPIII-3 OS=Vipera ammodytes ammodytes OX=8705 PE=1 SV=1	36837	63	38	236.78	40
Q4VM08|VM3VA_MACLB	Zinc metalloproteinase-disintegrin-like VLAIP-A OS=Macrovipera lebetina OX=8709 PE=1 SV=1	68710	48	3	225.72	32
tr|A0A6B7FRF2|A0A6B7FRF2_VIPAA	Amine oxidase OS=Vipera ammodytes ammodytes OX=8705 PE=2 SV=1	57103	92	11	220.35	49
tr|A0A6B7FMR4|A0A6B7FMR4_VIPAA	Metalloproteinase of class P-III MPIII-4 OS=Vipera ammodytes ammodytes OX=8705 PE=2 SV=1	68844	51	25	203.06	42
tr|A0A6B7FNN4|A0A6B7FNN4_VIPAA	Metalloproteinase of class P-III MPIII-5 OS=Vipera ammodytes ammodytes OX=8705 PE=2 SV=1	68346	48	5	202.17	38
R4NNL0|VMH3_VIPAA	Zinc metalloproteinase-disintegrin-like protein H3 OS=Vipera ammodytes ammodytes OX=8705 PE=1 SV=1	68546	48	5	202.17	38
tr|A0A1I9KNT0|A0A1I9KNT0_VIPAA	Metalloproteinase of class P-II MPII-1 OS=Vipera ammodytes ammodytes OX=8705 PE=2 SV=1	53479	40	13	201.87	30
tr|A0A1I9KNR6|A0A1I9KNR6_VIPAA	Metalloproteinase of class P-III MPIII-1 OS=Vipera ammodytes ammodytes OX=8705 PE=2 SV=1	68388	30	20	190.83	25
tr|A0A1I9KNR7|A0A1I9KNR7_VIPAA	Disintegrin Dis-1 OS=Vipera ammodytes ammodytes OX=8705 PE=2 SV=1	13997	27	10	180.09	56
tr|A0A1I9KNR4|A0A1I9KNR4_VIPAA	Disintegrin Dis-1 OS=Vipera ammodytes ammodytes OX=8705 PE=2 SV=1	13983	27	10	180.09	56
E0Y418|VSP1_MACLB	Serine protease VLSP-1 OS=Macrovipera lebetina OX=8709 PE=2 SV=1	28702	30	13	175.86	54
E5AJX2|VSP_VIPBN	Snake venom serine protease nikobin OS=Vipera berus nikolskii OX=1808362 GN=sp-VN PE=2 SV=1	28216	40	5	174.05	50
W8EFS0|V5NTD_MACLB	Snake venom 5'-nucleotidase (Fragment) OS=Macrovipera lebetina OX=8709 PE=1 SV=1	45031	31	7	170.88	57
tr|E9JG58|E9JG58_ECHCO	Metalloproteinase (Fragment) OS=Echis coloratus OX=64175 PE=2 SV=1	56407	30	2	170.56	21
tr|A0A1I9KNS3|A0A1I9KNS3_VIPAA	Metalloproteinase of class P-II MPII-3 OS=Vipera ammodytes ammodytes OX=8705 PE=2 SV=1	53069	24	7	169.07	23
tr|F2Q6F2|F2Q6F2_DABRR	Cysteine-rich seceretory protein Dr-CRPK OS=Daboia russelii OX=8707 PE=2 SV=1	26688	30	4	165.22	41
P82475|TXVE2_MACLB	Snake venom vascular endothelial growth factor toxin ICPP OS=Macrovipera lebetina OX=8709 PE=1 SV=2	12574	23	23	164.63	68
P0DW97|TXVE_DABPA	Snake venom vascular endothelial growth factor toxin OS=Daboia palaestinae OX=1170828 PE=1 SV=1	12590	23	23	164.63	68
E0Y421|VSPY_MACLB	Chymotrypsin-like protease VLCTLP OS=Macrovipera lebetina OX=8709 PE=1 SV=1	28278	26	4	163.8	55
tr|A0A1I9KNL5|A0A1I9KNL5_VIPAA	Serine proteinase SP-2 OS=Vipera ammodytes ammodytes OX=8705 PE=2 SV=1	28885	37	22	159.91	51
tr|A0A194APV2|A0A194APV2_9SAUR	L-amino-acid oxidase OS=Agkistrodon piscivorus OX=8715 PE=3 SV=1	58647	32	2	158.8	27
tr|A0A6G5ZVX7|A0A6G5ZVX7_VIPAN	Serine protease 7 OS=Vipera anatolica senliki OX=2604287 PE=2 SV=1	28928	27	3	158.2	50
A0A1I9KNP0|VSPH1_VIPAA	Vaa serine proteinase homolog 1 OS=Vipera ammodytes ammodytes OX=8705 PE=1 SV=1	28928	27	3	158.2	50
C0HKZ6|SLMA_MACLB	Snaclec macrovipecetin subunit alpha OS=Macrovipera lebetina OX=8709 PE=1 SV=1	15418	26	14	153.02	73
P0DMT4|CRVP_ECHCO	Cysteine-rich venom protein OS=Echis coloratus OX=64175 PE=1 SV=1	24699	22	3	151.71	33
tr|A0A0A1WCN2|A0A0A1WCN2_ECHCO	Cysteine-Rich Secretory Protein B OS=Echis coloratus OX=64175 PE=2 SV=1	26686	22	3	151.71	31
Q9PT40|VSPH2_MACLB	Snake venom serine protease homolog 2 OS=Macrovipera lebetina OX=8709 PE=2 SV=1	28894	24	3	151.52	48
tr|K9JBV0|K9JBV0_DABSI	p68 alpha subunit OS=Daboia siamensis OX=343250 PE=2 SV=1	17996	23	3	150.84	53
B4XSY8|SLAD_MACLB	Snaclec A13 OS=Macrovipera lebetina OX=8709 PE=2 SV=1	15308	22	5	148.96	66
B4XSY7|SLAC_MACLB	Snaclec A12 OS=Macrovipera lebetina OX=8709 PE=2 SV=1	17717	22	5	148.96	55
tr|K9JBU4|K9JBU4_DABSI	p68 beta subunit OS=Daboia siamensis OX=343250 PE=2 SV=1	16910	27	8	147.96	56
tr|K9JCR4|K9JCR4_DABRR	p68 beta subunit OS=Daboia russelii limitis OX=338883 PE=2 SV=1	16910	27	8	147.96	56
tr|A0A1I9KNN1|A0A1I9KNN1_VIPAA	C-type lectin snaclec-3 OS=Vipera ammodytes ammodytes OX=8705 PE=2 SV=1	17398	21	5	147.62	53
tr|A0A6B7FMP6|A0A6B7FMP6_VIPAA	C-type lectin-like Snaclec-9 OS=Vipera ammodytes ammodytes OX=8705 PE=2 SV=1	18081	20	3	147.23	49
tr|A0A1J0CZM4|A0A1J0CZM4_VIPAA	Snaclec-5 OS=Vipera ammodytes ammodytes OX=8705 PE=2 SV=1	18101	25	9	146.74	58
tr|A0A1J0CZM8|A0A1J0CZM8_VIPAA	Snaclec-6 OS=Vipera ammodytes ammodytes OX=8705 PE=2 SV=1	18052	25	9	146.74	58
tr|A0A0B8RNS9|A0A0B8RNS9_BOIIR	Xaa-Pro aminopeptidase 2 OS=Boiga irregularis OX=92519 PE=3 SV=1	76736	20	20	145.44	17
Q98995|VM2L2_MACLB	Zinc metalloproteinase/disintegrin OS=Macrovipera lebetina OX=8709 PE=1 SV=1	53480	18	11	144.96	12
tr|E9JG39|E9JG39_ECHCS	Metalloproteinase OS=Echis carinatus sochureki OX=124223 PE=2 SV=1	69526	18	2	144.21	20
A8CG87|PA2A2_DABRR	Acidic phospholipase A2 Drk-a2 OS=Daboia russelii OX=8707 PE=2 SV=1	15586	18	3	142.98	33
A8CG78|PA2A2_DABSI	Acidic phospholipase A2 DsM-a2/DsM-a2' OS=Daboia siamensis OX=343250 PE=1 SV=1	15586	18	3	142.98	33
tr|A0A1J0CZM6|A0A1J0CZM6_VIPAA	Snaclec-8 OS=Vipera ammodytes ammodytes OX=8705 PE=2 SV=1	17142	19	2	140.76	53
Q8JI40|CRVP_GLOBL	Cysteine-rich venom protein ablomin OS=Gloydius blomhoffii OX=242054 PE=1 SV=1	26914	18	2	137.92	28
tr|K9JBU0|K9JBU0_DABRR	Dabocetin alpha subunit OS=Daboia russelii russelii OX=31159 PE=2 SV=1	17493	16	4	137.02	43
tr|A0A1J0CZM7|A0A1J0CZM7_VIPAA	Snaclec-7 OS=Vipera ammodytes ammodytes OX=8705 PE=2 SV=1	17285	20	4	136.29	56
P83253|DID1A_MACLB	Disintegrin lebein-1-alpha OS=Macrovipera lebetina OX=8709 PE=1 SV=2	12099	13	7	135.58	59
tr|A0A098LWS4|A0A098LWS4_PYTRG	Amine oxidase OS=Python regius OX=51751 PE=2 SV=1	57250	12	2	130.86	10
P31854|PA2B_VIPBB	Basic phospholipase A2 Pla2Vb OS=Vipera berus berus OX=31156 PE=1 SV=2	15716	13	8	129.3	28
B4XT06|SLB7_MACLB	Snaclec B7 (Fragment) OS=Macrovipera lebetina OX=8709 PE=2 SV=1	15036	15	5	128.93	42
C0LZJ5|VM3LC_MACLN	Disintegrin-like leberagin-C OS=Macrovipera lebetina transmediterranea OX=384075 PE=1 SV=1	22634	12	3	127.82	23
tr|F8S109|F8S109_CROAD	Metalloproteinase 8 (Fragment) OS=Crotalus adamanteus OX=8729 PE=2 SV=1	54615	14	2	127.16	16
tr|J3S831|J3S831_CROAD	Snake venom metalloproteinase (Type III) 5 OS=Crotalus adamanteus OX=8729 PE=2 SV=1	68434	14	2	127.16	13
tr|A0A1W7RB90|A0A1W7RB90_CROAD	Cadam10_SVMPIII-2 OS=Crotalus adamanteus OX=8729 PE=4 SV=1	68421	14	2	127.16	13
tr|E9JG38|E9JG38_ECHCS	Metalloproteinase OS=Echis carinatus sochureki OX=124223 PE=2 SV=1	68453	12	2	126.6	8
tr|E9JG41|E9JG41_ECHCS	Metalloproteinase OS=Echis carinatus sochureki OX=124223 PE=2 SV=1	68427	12	2	126.6	8
tr|A0A6B7FMQ9|A0A6B7FMQ9_VIPAA	Phospholipase B-like OS=Vipera ammodytes ammodytes OX=8705 PE=2 SV=1	64310	15	6	122.67	24
tr|A0A1W7RBA3|A0A1W7RBA3_CROAD	Cadam10_SVMPIII-1 OS=Crotalus adamanteus OX=8729 PE=4 SV=1	68693	13	2	119.27	15
P0DJE2|VM3A_VIPAA	Zinc metalloproteinase-disintegrin-like ammodytagin (Fragment) OS=Vipera ammodytes ammodytes OX=8705 PE=1 SV=3	19902	11	3	116.78	34
tr|A0A6B7FRK6|A0A6B7FRK6_VIPAA	Metalloproteinase of class P-III MPIII-2 OS=Vipera ammodytes ammodytes OX=8705 PE=2 SV=1	69218	10	3	115.48	14
Q71QH5|VSP08_TRIST	Snake venom serine protease KN8 OS=Trimeresurus stejnegeri OX=39682 PE=2 SV=1	28176	9	7	113.41	10
Q7T046|VM3CX_MACLB	Coagulation factor X-activating enzyme heavy chain OS=Macrovipera lebetina OX=8709 PE=1 SV=1	68775	8	2	111.03	8
A0A0B4U9L8|VMF1_VIPAA	Zinc metalloproteinase-disintegrin-like protein F1 OS=Vipera ammodytes ammodytes OX=8705 PE=1 SV=1	68745	12	3	109.69	14
tr|V9I168|V9I168_VIPUR	Venom nerve growth factor OS=Vipera ursinii OX=103942 PE=2 SV=1	27284	6	6	104.38	17
tr|A0A6G5ZVU9|A0A6G5ZVU9_VIPAN	Nerve growth factor 1 OS=Vipera anatolica senliki OX=2604287 PE=2 SV=1	27325	6	6	104.38	17
tr|E9JG53|E9JG53_ECHCS	Metalloproteinase (Fragment) OS=Echis carinatus sochureki OX=124223 PE=2 SV=1	27821	10	4	104.35	7
tr|E9JG44|E9JG44_ECHCS	Metalloproteinase (Fragment) OS=Echis carinatus sochureki OX=124223 PE=2 SV=1	29963	10	4	104.35	7
tr|E9KNB4|E9KNB4_ECHCS	Group III snake venom metalloproteinase OS=Echis carinatus sochureki OX=124223 GN=Ecs00087 PE=2 SV=1	68676	8	2	103.82	8
tr|A0A8T1N163|A0A8T1N163_BOTJA	Snake venom serine protease OS=Bothrops jararaca OX=8724 GN=JKG30_000013 PE=3 SV=1	28659	9	3	102.88	24
E5AJX3|VKT_VIPBN	Kunitz-type serine protease inhibitor ki-VN OS=Vipera berus nikolskii OX=1808362 PE=2 SV=1	10426	10	5	102.63	35
V5TBK6|VMH4A_VIPAA	Zinc metalloproteinase-disintegrin-like protein H4 subunit A OS=Vipera ammodytes ammodytes OX=8705 PE=1 SV=1	68662	7	2	95.44	9
U5PZ28|VM2H1_BOTLA	Zinc metalloproteinase-disintegrin BlatH1 OS=Bothriechis lateralis OX=44727 PE=1 SV=1	54298	4	2	93.54	8
tr|A0A1S5QJJ2|A0A1S5QJJ2_VIPAA	Kunitz/BPTI inhibitor-1 OS=Vipera ammodytes ammodytes OX=8705 PE=3 SV=1	10312	8	3	91.81	33
Q71RR0|SL9B3_TRIST	Snaclec coagulation factor IX/factor X-binding protein subunit B3 (Fragment) OS=Trimeresurus stejnegeri OX=39682 PE=2 SV=1	15019	5	2	88.23	15
tr|M9NCR9|M9NCR9_CERGO	Glutaminyl-peptide cyclotransferase OS=Cerrophidion godmani OX=44722 GN=QC-2 PE=2 SV=1	41199	7	7	85.29	12
B5U6Y6|SL124_ECHOC	Snaclec CTL-Eoc124 OS=Echis ocellatus OX=99586 PE=2 SV=1	16882	6	3	82.68	14
P82972|VNP_PSEPC	Natriuretic peptide PNP OS=Pseudocerastes persicus OX=47769 PE=1 SV=1	3944	4	2	81.9	41
tr|A0A077L844|A0A077L844_PROFL	C-type lectin B (Fragment) OS=Protobothrops flavoviridis OX=88087 PE=2 SV=1	13167	6	2	76.82	19
tr|T2HP53|T2HP53_PROFL	C-type lectin beta subunit (Fragment) OS=Protobothrops flavoviridis OX=88087 PE=2 SV=1	16893	6	2	76.82	14
W8E7D1|PDE_MACLB	Venom phosphodiesterase OS=Macrovipera lebetina OX=8709 PE=1 SV=1	96181	5	5	74.5	8
Q7LZ09|LEB_MACLB	Lebetin-2-alpha OS=Macrovipera lebetina OX=8709 PE=1 SV=1	3945	4	2	69.69	63
tr|Q7LZP2|Q7LZP2_CROAD	Adamalysin II OS=Crotalus adamanteus OX=8729 PE=4 SV=1	23310	4	3	66.77	11
P17497|VM2_BITAR	Disintegrin bitistatin OS=Bitis arietans OX=8692 PE=1 SV=1	9004	3	3	66.65	39
tr|Q4JCR9|Q4JCR9_BITAR	Disintegrin isoform Dc-1 (Fragment) OS=Bitis arietans OX=8692 PE=2 SV=1	11943	3	3	66.65	30
tr|A0A9F2NCF7|A0A9F2NCF7_PYTBI	Chymotrypsinogen 2-like OS=Python bivittatus OX=176946 GN=LOC103054169 PE=3 SV=1	27901	4	3	64.64	12
Q8AYA5|SLA2_DEIAC	Snaclec agglucetin subunit alpha-2 OS=Deinagkistrodon acutus OX=36307 PE=1 SV=1	17977	3	2	59.92	15
tr|A0A0H3U267|A0A0H3U267_TRIAB	Phospholipase A2 OS=Trimeresurus albolabris OX=8765 PE=3 SV=1	15239	3	2	59.55	33
tr|A0A0H3U245|A0A0H3U245_TRIAB	Phospholipase A2 OS=Trimeresurus albolabris OX=8765 PE=3 SV=1	15197	3	2	59.55	33
tr|A0A0H3U281|A0A0H3U281_TRIAB	Phospholipase A2 OS=Trimeresurus albolabris OX=8765 PE=3 SV=1	15213	3	2	59.55	33
tr|A0A0K8RZP3|A0A0K8RZP3_CROHD	Disintegrin and metalloproteinase domain-containing protein 9 OS=Crotalus horridus OX=35024 PE=4 SV=1	94622	2	2	55.43	3
Q7LZS9|VM1A_DEIAC	Snake venom metalloproteinase Ac1 OS=Deinagkistrodon acutus OX=36307 PE=1 SV=1	22945	2	2	53.77	6
Q2EI26|VM1PA_DEIAC	Snake venom metalloproteinase AaPA OS=Deinagkistrodon acutus OX=36307 PE=2 SV=1	46758	2	2	53.77	3
Q9PW35|VM1AA_DEIAC	Snake venom metalloproteinase acutolysin-A OS=Deinagkistrodon acutus OX=36307 PE=1 SV=1	46565	2	2	53.77	3
Q9PWJ0|VM2A2_DEIAC	Zinc metalloproteinase/disintegrin OS=Deinagkistrodon acutus OX=36307 GN=wbfib4 PE=1 SV=1	53891	2	2	53.77	3

## Sheet: M. bulgardaghica_Trypsin
Protein ID	Protein description	Average Mass	# of matched peptides	# of unique peptides	Protein score (-10LgP)	Proteoin coverage
tr|A0A6B7FMR4|A0A6B7FMR4_VIPAA	Metalloproteinase of class P-III MPIII-4 OS=Vipera ammodytes ammodytes OX=8705 PE=2 SV=1	68844	26	20	252.44	33
tr|A0A6B7FNN4|A0A6B7FNN4_VIPAA	Metalloproteinase of class P-III MPIII-5 OS=Vipera ammodytes ammodytes OX=8705 PE=2 SV=1	68346	36	9	245	34
R4NNL0|VMH3_VIPAA	Zinc metalloproteinase-disintegrin-like protein H3 OS=Vipera ammodytes ammodytes OX=8705 PE=1 SV=1	68546	36	9	245	34
tr|A0A6B7FRF2|A0A6B7FRF2_VIPAA	Amine oxidase OS=Vipera ammodytes ammodytes OX=8705 PE=2 SV=1	57103	42	6	235.17	32
A0A6B7FMR5|VMMP3_VIPAA	Disintegrin-like/cysteine-rich protein MPIII-3 OS=Vipera ammodytes ammodytes OX=8705 PE=1 SV=1	36837	23	10	232.26	20
P31854|PA2B_VIPBB	Basic phospholipase A2 Pla2Vb OS=Vipera berus berus OX=31156 PE=1 SV=2	15716	21	6	223.92	46
Q4VM08|VM3VA_MACLB	Zinc metalloproteinase-disintegrin-like VLAIP-A OS=Macrovipera lebetina OX=8709 PE=1 SV=1	68710	29	4	223.72	24
tr|Q6A3B4|Q6A3B4_VIPAS	Ammodytin I2(B) variant OS=Vipera aspis atra OX=246182 PE=2 SV=1	15283	16	2	210.07	64
W8EFS0|V5NTD_MACLB	Snake venom 5'-nucleotidase (Fragment) OS=Macrovipera lebetina OX=8709 PE=1 SV=1	45031	16	5	205.14	40
tr|Q6A362|Q6A362_VIPAP	Ammodytoxin B isoform OS=Vipera aspis aspis OX=194601 PE=2 SV=1	15529	7	3	197.64	23
P14424|PA2BB_VIPAA	Basic phospholipase A2 ammodytoxin B OS=Vipera ammodytes ammodytes OX=8705 PE=1 SV=2	15529	7	3	197.64	23
tr|Q6A360|Q6A360_VIPAP	Ammodytoxin B isoform OS=Vipera aspis aspis OX=194601 PE=2 SV=1	15559	7	3	197.64	23
tr|A0A1I9KNT0|A0A1I9KNT0_VIPAA	Metalloproteinase of class P-II MPII-1 OS=Vipera ammodytes ammodytes OX=8705 PE=2 SV=1	53479	13	2	193.99	19
B4XSY5|SLAA_MACLB	Snaclec A10 OS=Macrovipera lebetina OX=8709 PE=2 SV=1	17731	13	3	191.58	36
tr|A0A1I9KNR7|A0A1I9KNR7_VIPAA	Disintegrin Dis-1 OS=Vipera ammodytes ammodytes OX=8705 PE=2 SV=1	13997	12	12	188.77	48
tr|A0A1I9KNR4|A0A1I9KNR4_VIPAA	Disintegrin Dis-1 OS=Vipera ammodytes ammodytes OX=8705 PE=2 SV=1	13983	12	12	188.77	48
tr|A0A1I9KNR6|A0A1I9KNR6_VIPAA	Metalloproteinase of class P-III MPIII-1 OS=Vipera ammodytes ammodytes OX=8705 PE=2 SV=1	68388	12	5	187.22	11
Q9PT40|VSPH2_MACLB	Snake venom serine protease homolog 2 OS=Macrovipera lebetina OX=8709 PE=2 SV=1	28894	21	2	185.68	39
tr|A0A1I9KNP1|A0A1I9KNP1_VIPAA	C-type lectin snaclec-4 OS=Vipera ammodytes ammodytes OX=8705 PE=2 SV=1	17505	13	4	185.68	48
B4XSY8|SLAD_MACLB	Snaclec A13 OS=Macrovipera lebetina OX=8709 PE=2 SV=1	15308	14	2	184.61	46
E0Y418|VSP1_MACLB	Serine protease VLSP-1 OS=Macrovipera lebetina OX=8709 PE=2 SV=1	28702	17	13	181.52	22
tr|F8S109|F8S109_CROAD	Metalloproteinase 8 (Fragment) OS=Crotalus adamanteus OX=8729 PE=2 SV=1	54615	13	3	180.01	15
tr|A0A1W7RB90|A0A1W7RB90_CROAD	Cadam10_SVMPIII-2 OS=Crotalus adamanteus OX=8729 PE=4 SV=1	68421	13	3	180.01	12
tr|J3S831|J3S831_CROAD	Snake venom metalloproteinase (Type III) 5 OS=Crotalus adamanteus OX=8729 PE=2 SV=1	68434	13	3	180.01	12
tr|A0A1J0CZM7|A0A1J0CZM7_VIPAA	Snaclec-7 OS=Vipera ammodytes ammodytes OX=8705 PE=2 SV=1	17285	12	8	179.35	43
E5AJX2|VSP_VIPBN	Snake venom serine protease nikobin OS=Vipera berus nikolskii OX=1808362 GN=sp-VN PE=2 SV=1	28216	12	2	177.14	28
P82475|TXVE2_MACLB	Snake venom vascular endothelial growth factor toxin ICPP OS=Macrovipera lebetina OX=8709 PE=1 SV=2	12574	10	10	174.39	57
P0DW97|TXVE_DABPA	Snake venom vascular endothelial growth factor toxin OS=Daboia palaestinae OX=1170828 PE=1 SV=1	12590	10	10	174.39	57
tr|A0A1I9KNP6|A0A1I9KNP6_VIPAA	C-type lectin snaclec-1 OS=Vipera ammodytes ammodytes OX=8705 PE=2 SV=1	17626	13	4	174.02	38
P0DJL4|SLA_DABPA	Snaclec VP12 subunit A (Fragment) OS=Daboia palaestinae OX=1170828 PE=1 SV=1	12125	9	8	171.31	53
tr|K9JBU4|K9JBU4_DABSI	p68 beta subunit OS=Daboia siamensis OX=343250 PE=2 SV=1	16910	11	5	167.32	32
tr|K9JCR4|K9JCR4_DABRR	p68 beta subunit OS=Daboia russelii limitis OX=338883 PE=2 SV=1	16910	11	5	167.32	32
tr|A0A6G5ZW78|A0A6G5ZW78_VIPAN	Serine protease 2 OS=Vipera anatolica senliki OX=2604287 PE=2 SV=1	28103	11	2	165.66	33
B4XT06|SLB7_MACLB	Snaclec B7 (Fragment) OS=Macrovipera lebetina OX=8709 PE=2 SV=1	15036	8	5	157.62	29
P0DJL5|SLB_DABPA	Snaclec VP12 subunit B OS=Daboia palaestinae OX=1170828 PE=1 SV=1	15157	11	2	156.41	58
Q71QH5|VSP08_TRIST	Snake venom serine protease KN8 OS=Trimeresurus stejnegeri OX=39682 PE=2 SV=1	28176	9	7	153.03	11
tr|A0A6G5ZVU9|A0A6G5ZVU9_VIPAN	Nerve growth factor 1 OS=Vipera anatolica senliki OX=2604287 PE=2 SV=1	27325	7	7	149.54	26
tr|A0A0H3U209|A0A0H3U209_9SAUR	Phospholipase A2 OS=Ovophis makazayazaya OX=699371 PE=3 SV=1	15629	5	2	146.92	17
tr|A0A0B8RNS9|A0A0B8RNS9_BOIIR	Xaa-Pro aminopeptidase 2 OS=Boiga irregularis OX=92519 PE=3 SV=1	76736	7	7	144.96	10
tr|A0A1I9KNL5|A0A1I9KNL5_VIPAA	Serine proteinase SP-2 OS=Vipera ammodytes ammodytes OX=8705 PE=2 SV=1	28885	13	7	142.33	23
tr|K9JDF2|K9JDF2_DABRR	p68 alpha subunit OS=Daboia russelii limitis OX=338883 PE=2 SV=1	18108	8	2	142.01	24
tr|K9JBV0|K9JBV0_DABSI	p68 alpha subunit OS=Daboia siamensis OX=343250 PE=2 SV=1	17996	8	2	142.01	24
Q7LZ09|LEB_MACLB	Lebetin-2-alpha OS=Macrovipera lebetina OX=8709 PE=1 SV=1	3945	6	6	138.9	37
tr|E9JG39|E9JG39_ECHCS	Metalloproteinase OS=Echis carinatus sochureki OX=124223 PE=2 SV=1	69526	9	3	137.02	8
tr|K9JDF6|K9JDF6_DABSI	p31 beta subunit OS=Daboia siamensis OX=343250 PE=2 SV=1	17338	5	5	135.67	17
tr|K9JBV3|K9JBV3_DABRR	p31 beta subunit OS=Daboia russelii limitis OX=338883 PE=2 SV=1	17252	5	5	135.67	17
tr|K9JDK6|K9JDK6_DABRR	p31 beta subunit OS=Daboia russelii russelii OX=31159 PE=2 SV=1	17378	5	5	135.67	17
tr|A0A286S0E6|A0A286S0E6_GLOIT	Venom plasminogen activator 2 OS=Gloydius intermedius OX=44732 GN=PA2 PE=2 SV=1	28146	9	2	131.29	23
tr|E9JGA3|E9JGA3_ECHCO	Metalloproteinase (Fragment) OS=Echis coloratus OX=64175 PE=2 SV=1	55138	5	3	129.05	10
Q9PT41|VSPF5_MACLB	Factor V activator OS=Macrovipera lebetina OX=8709 PE=1 SV=1	28595	5	4	125.78	14
tr|A0A1L8D689|A0A1L8D689_BOTAT	Snake venom metalloproteinase OS=Bothrops atrox OX=8725 PE=2 SV=1	67598	4	2	123.84	5
tr|A0A1J0CZM4|A0A1J0CZM4_VIPAA	Snaclec-5 OS=Vipera ammodytes ammodytes OX=8705 PE=2 SV=1	18101	6	3	121.81	30
tr|A0A1J0CZM8|A0A1J0CZM8_VIPAA	Snaclec-6 OS=Vipera ammodytes ammodytes OX=8705 PE=2 SV=1	18052	6	3	121.81	30
P0DJE2|VM3A_VIPAA	Zinc metalloproteinase-disintegrin-like ammodytagin (Fragment) OS=Vipera ammodytes ammodytes OX=8705 PE=1 SV=3	19902	6	2	119.44	24
tr|A0A1W7RBB1|A0A1W7RBB1_CROAD	Cadam10_SVMPIII-7 OS=Crotalus adamanteus OX=8729 PE=4 SV=1	69576	6	5	117.54	5
tr|F8S111|F8S111_CROAD	Metalloproteinase 10 (Fragment) OS=Crotalus adamanteus OX=8729 PE=2 SV=1	43048	6	5	117.54	8
tr|J3RY90|J3RY90_CROAD	Snake venom metalloproteinase (Type III) 6 OS=Crotalus adamanteus OX=8729 PE=2 SV=1	69653	6	5	117.54	5
C0HKZ6|SLMA_MACLB	Snaclec macrovipecetin subunit alpha OS=Macrovipera lebetina OX=8709 PE=1 SV=1	15418	4	4	115.68	21
tr|E9JG53|E9JG53_ECHCS	Metalloproteinase (Fragment) OS=Echis carinatus sochureki OX=124223 PE=2 SV=1	27821	6	2	115.4	11
tr|E9JG44|E9JG44_ECHCS	Metalloproteinase (Fragment) OS=Echis carinatus sochureki OX=124223 PE=2 SV=1	29963	6	2	115.4	10
tr|A0A6B7FMQ9|A0A6B7FMQ9_VIPAA	Phospholipase B-like OS=Vipera ammodytes ammodytes OX=8705 PE=2 SV=1	64310	5	5	114.52	9
tr|E9JGA7|E9JGA7_ECHCO	Metalloproteinase OS=Echis coloratus OX=64175 PE=2 SV=1	68942	6	2	112.1	6
tr|A0A1W7RJV9|A0A1W7RJV9_AGKCO	Snake venom serine protease OS=Agkistrodon contortrix contortrix OX=8713 PE=3 SV=1	28823	7	3	109.59	20
tr|A0A194ARX9|A0A194ARX9_SISMB	Metalloproteinase type III 10 OS=Sistrurus miliarius barbouri OX=8759 PE=4 SV=1	67425	3	3	106.48	3
tr|A0A194ARK5|A0A194ARK5_SISTE	Metalloproteinase type III 11a OS=Sistrurus tergeminus OX=8757 PE=4 SV=1	67312	3	3	106.48	3
tr|J3S3W1|J3S3W1_CROAD	Cadam10_SVMPIII-3 OS=Crotalus adamanteus OX=8729 PE=2 SV=1	67329	3	3	106.48	3
tr|J3SDW5|J3SDW5_CROAD	Metalloproteinase (Type III) 1a OS=Crotalus adamanteus OX=8729 PE=2 SV=1	67330	3	3	106.48	3
V5TBK6|VMH4A_VIPAA	Zinc metalloproteinase-disintegrin-like protein H4 subunit A OS=Vipera ammodytes ammodytes OX=8705 PE=1 SV=1	68662	4	2	104.22	4
tr|W8EEP5|W8EEP5_MACLB	Hyaluronidase (Fragment) OS=Macrovipera lebetina OX=8709 PE=2 SV=1	40873	4	2	94.96	10
tr|E9JG24|E9JG24_ECHCS	Serine protease (Fragment) OS=Echis carinatus sochureki OX=124223 PE=2 SV=1	25724	3	2	92.12	10
tr|T1DNX8|T1DNX8_CROHD	Aminopeptidase OS=Crotalus horridus OX=35024 PE=2 SV=1	110767	3	3	86.84	3
tr|A0A0K8S2L4|A0A0K8S2L4_CROHD	Aminopeptidase OS=Crotalus horridus OX=35024 PE=3 SV=1	110737	3	3	86.84	3
tr|A0A1W7RH88|A0A1W7RH88_AGKCO	Glutaminyl-peptide cyclotransferase OS=Agkistrodon contortrix contortrix OX=8713 PE=3 SV=1	42352	2	2	85.91	7
tr|M9NCD2|M9NCD2_CERGO	Glutaminyl-peptide cyclotransferase OS=Cerrophidion godmani OX=44722 GN=QC-1 PE=2 SV=1	40415	2	2	85.91	7
tr|U3TBM3|U3TBM3_OVOOK	Glutaminyl-peptide cyclotransferase (Fragment) OS=Ovophis okinavensis OX=8769 PE=2 SV=1	40742	2	2	85.91	7
tr|M9NCI9|M9NCI9_TRIGS	Glutaminyl-peptide cyclotransferase OS=Trimeresurus gracilis OX=109781 GN=QC PE=2 SV=1	42295	2	2	85.91	7
tr|M9NCI8|M9NCI8_CROAT	Glutaminyl-peptide cyclotransferase OS=Crotalus atrox OX=8730 GN=QC PE=2 SV=1	42299	2	2	85.91	7
tr|J3S3V2|J3S3V2_CROAD	Glutaminyl-peptide cyclotransferase OS=Crotalus adamanteus OX=8729 PE=2 SV=1	42354	2	2	85.91	7
tr|A0A0K8S0L7|A0A0K8S0L7_CROHD	Glutaminyl-peptide cyclotransferase OS=Crotalus horridus OX=35024 PE=3 SV=1	42370	2	2	85.91	7
tr|A0A098LZZ5|A0A098LZZ5_9SAUR	Glutaminyl-peptide cyclotransferase OS=Hypsiglena sp. JMG-2014 OX=1550645 PE=3 SV=1	42028	2	2	85.91	7
tr|U3FZH0|U3FZH0_MICFL	Glutaminyl-peptide cyclotransferase OS=Micrurus fulvius OX=8637 PE=2 SV=1	42150	2	2	85.91	7
Q90YA8|QPCT_GLOBL	Glutaminyl-peptide cyclotransferase OS=Gloydius blomhoffii OX=242054 GN=QPCT PE=2 SV=1	42267	2	2	85.91	7
tr|T1DH29|T1DH29_CROHD	Glutaminyl-peptide cyclotransferase OS=Crotalus horridus OX=35024 PE=2 SV=1	42369	2	2	85.91	7
tr|M9NCD3|M9NCD3_SISTE	Glutaminyl-peptide cyclotransferase OS=Sistrurus tergeminus OX=8757 GN=QC PE=2 SV=1	42297	2	2	85.91	7
Q9YIB5|QPCT_BOTJA	Glutaminyl-peptide cyclotransferase OS=Bothrops jararaca OX=8724 GN=QPCT PE=2 SV=1	42204	2	2	85.91	7
tr|U3TDL2|U3TDL2_OVOOK	Glutaminyl-peptide cyclotransferase (Fragment) OS=Ovophis okinavensis OX=8769 PE=2 SV=1	42400	2	2	85.91	7
tr|A0A346CM44|A0A346CM44_9SAUR	Metalloproteinase 17 (Fragment) OS=Ahaetulla prasina OX=499056 PE=2 SV=1	68144	2	2	84.11	3
tr|A0A346CM36|A0A346CM36_9SAUR	Metalloproteinase 31 (Fragment) OS=Ahaetulla prasina OX=499056 PE=2 SV=1	68120	2	2	84.11	3
tr|A0A346CM27|A0A346CM27_9SAUR	Metalloproteinase 35 (Fragment) OS=Ahaetulla prasina OX=499056 PE=2 SV=1	68041	2	2	84.11	3
tr|A0A346CM41|A0A346CM41_9SAUR	Metalloproteinase 37 (Fragment) OS=Ahaetulla prasina OX=499056 PE=2 SV=1	68148	2	2	84.11	3
tr|A0A346CM32|A0A346CM32_9SAUR	Metalloproteinase 22 (Fragment) OS=Ahaetulla prasina OX=499056 PE=2 SV=1	68152	2	2	84.11	3
U5PZ28|VM2H1_BOTLA	Zinc metalloproteinase-disintegrin BlatH1 OS=Bothriechis lateralis OX=44727 PE=1 SV=1	54298	2	2	83.39	3
tr|A0A194APG6|A0A194APG6_9SAUR	Metalloproteinase type II 1 OS=Agkistrodon piscivorus OX=8715 PE=4 SV=1	54419	2	2	83.39	3
tr|A8HR02|A8HR02_DEIAC	Thrombin-like protein (Fragment) OS=Deinagkistrodon acutus OX=36307 PE=2 SV=1	26007	3	3	82.72	10
tr|B3V4Z6|B3V4Z6_DEIAC	Thrombin-like protein DAV-WY OS=Deinagkistrodon acutus OX=36307 PE=2 SV=1	28705	3	3	82.72	9
P82972|VNP_PSEPC	Natriuretic peptide PNP OS=Pseudocerastes persicus OX=47769 PE=1 SV=1	3944	2	2	80.01	62
P00992|VKT3_VIPAA	Kunitz-type serine protease inhibitor 3 OS=Vipera ammodytes ammodytes OX=8705 PE=1 SV=2	10330	2	2	79.79	15
E5AJX3|VKT_VIPBN	Kunitz-type serine protease inhibitor ki-VN OS=Vipera berus nikolskii OX=1808362 PE=2 SV=1	10426	2	2	79.79	15
Q9PVK7|VM3_NAJKA	Zinc metalloproteinase-disintegrin-like cobrin OS=Naja kaouthia OX=8649 PE=2 SV=1	67662	2	2	75.9	2
tr|A0A8C6XJV4|A0A8C6XJV4_NAJNA	Uncharacterized protein OS=Naja naja OX=35670 PE=3 SV=1	68942	2	2	75.9	2
tr|A0A8C6XIQ9|A0A8C6XIQ9_NAJNA	Uncharacterized protein OS=Naja naja OX=35670 PE=3 SV=1	68844	2	2	75.9	2
tr|A0A8C6XIT1|A0A8C6XIT1_NAJNA	Uncharacterized protein OS=Naja naja OX=35670 PE=3 SV=1	68936	2	2	75.9	2
tr|A0A8C6XLA9|A0A8C6XLA9_NAJNA	Uncharacterized protein OS=Naja naja OX=35670 PE=3 SV=1	69048	2	2	75.9	2
B5U6Y4|PA2HS_ECHOC	Phospholipase A2 homolog OS=Echis ocellatus OX=99586 PE=1 SV=1	15634	2	2	71.12	7
tr|T2HS00|T2HS00_PROFL	Prosaposin OS=Protobothrops flavoviridis OX=88087 PE=2 SV=1	58564	2	2	70.66	3
tr|A0A2D4G9B5|A0A2D4G9B5_MICCO	C-type lectin domain-containing protein (Fragment) OS=Micrurus corallinus OX=54390 PE=3 SV=1	11772	2	2	66.03	10
tr|A0A223PK51|A0A223PK51_DABRR	Vascular endothelial growth factor A isoform 3 (Fragment) OS=Daboia russelii OX=8707 PE=2 SV=1	13468	2	2	62.8	25
tr|A0A223PK50|A0A223PK50_DABRR	Vascular endothelial growth factor A isoform 2 (Fragment) OS=Daboia russelii OX=8707 PE=2 SV=1	20011	2	2	62.8	17
C0K3N5|VEGFA_VIPAA	Vascular endothelial growth factor A OS=Vipera ammodytes ammodytes OX=8705 PE=2 SV=1	22460	2	2	62.8	16
tr|A0A0A1WCF9|A0A0A1WCF9_ECHCO	Vascular endothelial growth factor A OS=Echis coloratus OX=64175 PE=2 SV=1	22515	2	2	62.8	16
tr|A0A223PK54|A0A223PK54_DABRR	Vascular endothelial growth factor A isoform 1 (Fragment) OS=Daboia russelii OX=8707 PE=2 SV=1	22864	2	2	62.8	15
tr|A0A2D4LP71|A0A2D4LP71_9SAUR	78 kDa glucose-regulated protein (Fragment) OS=Micrurus spixii OX=129469 PE=3 SV=1	24811	2	2	60.9	13
tr|A0A1W7RH08|A0A1W7RH08_AGKCO	78 kDa glucose-regulated protein OS=Agkistrodon contortrix contortrix OX=8713 PE=3 SV=1	72067	2	2	60.9	4
tr|A0A0B8RUJ6|A0A0B8RUJ6_BOIIR	78 kDa glucose-regulated protein OS=Boiga irregularis OX=92519 PE=3 SV=1	71941	2	2	60.9	4
tr|J3S4I0|J3S4I0_CROAD	78 kDa glucose-regulated protein OS=Crotalus adamanteus OX=8729 PE=2 SV=1	72105	2	2	60.9	4
tr|T1DBJ9|T1DBJ9_CROHD	78 kDa glucose-regulated protein OS=Crotalus horridus OX=35024 PE=2 SV=1	72105	2	2	60.9	4
tr|U3FCL7|U3FCL7_MICFL	78 kDa glucose-regulated protein OS=Micrurus fulvius OX=8637 PE=2 SV=1	72106	2	2	60.9	4
tr|A0A098LYK7|A0A098LYK7_9SAUR	78 kDa glucose-regulated protein OS=Hypsiglena sp. JMG-2014 OX=1550645 PE=3 SV=1	72299	2	2	60.9	4
tr|J3RZN4|J3RZN4_CROAD	78 kDa glucose-regulated protein OS=Crotalus adamanteus OX=8729 PE=2 SV=1	75480	2	2	60.9	4

## Sheet: M. bulgardaghica_MELD
Protein ID	Protein description	Average Mass	# of matched peptides	# of unique peptides	Protein score (-10LgP)	Proteoin coverage
A0A6B7FMR5|VMMP3_VIPAA	Disintegrin-like/cysteine-rich protein MPIII-3 OS=Vipera ammodytes ammodytes OX=8705 PE=1 SV=1	36837	81	53	252.68	43
tr|A0A6B7FRF2|A0A6B7FRF2_VIPAA	Amine oxidase OS=Vipera ammodytes ammodytes OX=8705 PE=2 SV=1	57103	85	12	233.27	55
tr|A0A6B7FNN4|A0A6B7FNN4_VIPAA	Metalloproteinase of class P-III MPIII-5 OS=Vipera ammodytes ammodytes OX=8705 PE=2 SV=1	68346	71	16	232.14	45
R4NNL0|VMH3_VIPAA	Zinc metalloproteinase-disintegrin-like protein H3 OS=Vipera ammodytes ammodytes OX=8705 PE=1 SV=1	68546	71	16	232.14	45
tr|A0A6B7FMR4|A0A6B7FMR4_VIPAA	Metalloproteinase of class P-III MPIII-4 OS=Vipera ammodytes ammodytes OX=8705 PE=2 SV=1	68844	59	36	221.76	45
Q4VM08|VM3VA_MACLB	Zinc metalloproteinase-disintegrin-like VLAIP-A OS=Macrovipera lebetina OX=8709 PE=1 SV=1	68710	59	7	219.92	33
tr|Q6A362|Q6A362_VIPAP	Ammodytoxin B isoform OS=Vipera aspis aspis OX=194601 PE=2 SV=1	15529	28	19	219.21	36
P14424|PA2BB_VIPAA	Basic phospholipase A2 ammodytoxin B OS=Vipera ammodytes ammodytes OX=8705 PE=1 SV=2	15529	28	19	219.21	36
P00626|PA2BA_VIPAA	Basic phospholipase A2 ammodytoxin A OS=Vipera ammodytes ammodytes OX=8705 PE=1 SV=2	15531	28	19	219.21	36
tr|Q6A360|Q6A360_VIPAP	Ammodytoxin B isoform OS=Vipera aspis aspis OX=194601 PE=2 SV=1	15559	28	19	219.21	36
P31854|PA2B_VIPBB	Basic phospholipase A2 Pla2Vb OS=Vipera berus berus OX=31156 PE=1 SV=2	15716	64	9	209.94	65
tr|A0A1I9KNT0|A0A1I9KNT0_VIPAA	Metalloproteinase of class P-II MPII-1 OS=Vipera ammodytes ammodytes OX=8705 PE=2 SV=1	53479	38	17	206.93	35
W8EFS0|V5NTD_MACLB	Snake venom 5'-nucleotidase (Fragment) OS=Macrovipera lebetina OX=8709 PE=1 SV=1	45031	36	11	189.83	67
P0DJL4|SLA_DABPA	Snaclec VP12 subunit A (Fragment) OS=Daboia palaestinae OX=1170828 PE=1 SV=1	12125	35	23	182	84
B4XSY5|SLAA_MACLB	Snaclec A10 OS=Macrovipera lebetina OX=8709 PE=2 SV=1	17731	28	9	181.99	46
tr|A0A6G5ZVX7|A0A6G5ZVX7_VIPAN	Serine protease 7 OS=Vipera anatolica senliki OX=2604287 PE=2 SV=1	28928	38	10	181.31	65
A0A1I9KNP0|VSPH1_VIPAA	Vaa serine proteinase homolog 1 OS=Vipera ammodytes ammodytes OX=8705 PE=1 SV=1	28928	38	10	181.31	65
E0Y418|VSP1_MACLB	Serine protease VLSP-1 OS=Macrovipera lebetina OX=8709 PE=2 SV=1	28702	37	16	176.11	61
tr|A0A6B7FMP6|A0A6B7FMP6_VIPAA	C-type lectin-like Snaclec-9 OS=Vipera ammodytes ammodytes OX=8705 PE=2 SV=1	18081	22	5	176.07	49
P0DJL5|SLB_DABPA	Snaclec VP12 subunit B OS=Daboia palaestinae OX=1170828 PE=1 SV=1	15157	42	7	174.71	79
P82475|TXVE2_MACLB	Snake venom vascular endothelial growth factor toxin ICPP OS=Macrovipera lebetina OX=8709 PE=1 SV=2	12574	29	29	174.43	85
P0DW97|TXVE_DABPA	Snake venom vascular endothelial growth factor toxin OS=Daboia palaestinae OX=1170828 PE=1 SV=1	12590	29	29	174.43	85
B4XSY8|SLAD_MACLB	Snaclec A13 OS=Macrovipera lebetina OX=8709 PE=2 SV=1	15308	34	7	168.6	69
B4XSY7|SLAC_MACLB	Snaclec A12 OS=Macrovipera lebetina OX=8709 PE=2 SV=1	17717	34	7	168.6	58
tr|A0A1I9KNP1|A0A1I9KNP1_VIPAA	C-type lectin snaclec-4 OS=Vipera ammodytes ammodytes OX=8705 PE=2 SV=1	17505	39	5	167.09	57
tr|A0A1I9KNR7|A0A1I9KNR7_VIPAA	Disintegrin Dis-1 OS=Vipera ammodytes ammodytes OX=8705 PE=2 SV=1	13997	25	22	164.92	59
tr|A0A1I9KNR4|A0A1I9KNR4_VIPAA	Disintegrin Dis-1 OS=Vipera ammodytes ammodytes OX=8705 PE=2 SV=1	13983	25	22	164.92	59
tr|A0A194APV2|A0A194APV2_9SAUR	L-amino-acid oxidase OS=Agkistrodon piscivorus OX=8715 PE=3 SV=1	58647	31	5	159.64	27
tr|A0A1I9KNL5|A0A1I9KNL5_VIPAA	Serine proteinase SP-2 OS=Vipera ammodytes ammodytes OX=8705 PE=2 SV=1	28885	27	18	157.87	45
tr|A0A1J0CZM7|A0A1J0CZM7_VIPAA	Snaclec-7 OS=Vipera ammodytes ammodytes OX=8705 PE=2 SV=1	17285	23	5	157.12	62
tr|A0A6B7FQF8|A0A6B7FQF8_VIPAA	Serine proteinase SP-6 OS=Vipera ammodytes ammodytes OX=8705 PE=2 SV=1	28317	33	5	157.12	59
tr|A0A1J0CZM4|A0A1J0CZM4_VIPAA	Snaclec-5 OS=Vipera ammodytes ammodytes OX=8705 PE=2 SV=1	18101	27	12	156.84	60
tr|A0A1J0CZM8|A0A1J0CZM8_VIPAA	Snaclec-6 OS=Vipera ammodytes ammodytes OX=8705 PE=2 SV=1	18052	27	12	156.84	60
tr|K9JBU4|K9JBU4_DABSI	p68 beta subunit OS=Daboia siamensis OX=343250 PE=2 SV=1	16910	25	8	156.39	62
tr|K9JCR4|K9JCR4_DABRR	p68 beta subunit OS=Daboia russelii limitis OX=338883 PE=2 SV=1	16910	25	8	156.39	62
tr|Q6A3D9|Q6A3D9_VIPAP	Ammodytin I2(A'') isoform OS=Vipera aspis aspis OX=194601 PE=2 SV=1	15281	24	3	155.85	68
tr|Q6A3B1|Q6A3B1_VIPAA	Ammodytin I2(A') isoform OS=Vipera ammodytes ammodytes OX=8705 PE=2 SV=1	15322	24	3	155.85	68
tr|Q6YCN7|Q6YCN7_VIPBB	Ammodytin I2 OS=Vipera berus berus OX=31156 GN=AmtI2 PE=2 SV=1	15309	24	3	155.85	68
tr|Q6A3F2|Q6A3F2_VIPAZ	Ammodytin I2(A) isoform OS=Vipera aspis zinnikeri OX=55427 PE=2 SV=1	15309	24	3	155.85	68
tr|Q6A3F4|Q6A3F4_VIPAP	Ammodytin I2(A) variant OS=Vipera aspis aspis OX=194601 PE=2 SV=1	15279	24	3	155.85	68
tr|Q6YCN8|Q6YCN8_VIPAS	Ammodytin I2 OS=Vipera aspis OX=8706 GN=AmtI2 PE=3 SV=1	15309	24	3	155.85	68
tr|Q6A3F0|Q6A3F0_VIPAP	Ammodytin I2(E) isoform OS=Vipera aspis aspis OX=194601 PE=2 SV=1	15319	24	3	155.85	68
tr|Q6YCN9|Q6YCN9_VIPAP	Ammodytin I2 OS=Vipera aspis aspis OX=194601 GN=AmtI2 PE=2 SV=1	15309	24	3	155.85	68
P34180|PA2N2_VIPAA	Neutral phospholipase A2 ammodytin I2 OS=Vipera ammodytes ammodytes OX=8705 PE=1 SV=2	15309	24	3	155.85	68
tr|Q6A3C9|Q6A3C9_VIPAP	Ammodytin I2(A) variant OS=Vipera aspis aspis OX=194601 PE=2 SV=1	15324	24	3	155.85	68
tr|Q6A3C7|Q6A3C7_VIPAM	Ammodytin I2(A) isoform OS=Vipera ammodytes ruffoi OX=246549 PE=2 SV=1	15309	24	3	155.85	68
tr|Q6A3A9|Q6A3A9_VIPAA	Ammodytin I2(A) isoform OS=Vipera ammodytes ammodytes OX=8705 PE=2 SV=1	15309	24	3	155.85	68
tr|Q6A3E3|Q6A3E3_VIPAP	Ammodytin I2(A''') isoform OS=Vipera aspis aspis OX=194601 PE=2 SV=1	15293	24	3	155.85	68
Q9PT40|VSPH2_MACLB	Snake venom serine protease homolog 2 OS=Macrovipera lebetina OX=8709 PE=2 SV=1	28894	33	7	155.65	60
tr|K9JDF2|K9JDF2_DABRR	p68 alpha subunit OS=Daboia russelii limitis OX=338883 PE=2 SV=1	18108	21	4	153.91	50
tr|K9JBV0|K9JBV0_DABSI	p68 alpha subunit OS=Daboia siamensis OX=343250 PE=2 SV=1	17996	21	4	153.91	50
tr|A0A1J0CZM6|A0A1J0CZM6_VIPAA	Snaclec-8 OS=Vipera ammodytes ammodytes OX=8705 PE=2 SV=1	17142	22	4	153.75	64
E0Y421|VSPY_MACLB	Chymotrypsin-like protease VLCTLP OS=Macrovipera lebetina OX=8709 PE=1 SV=1	28278	19	4	153.45	48
A8CG87|PA2A2_DABRR	Acidic phospholipase A2 Drk-a2 OS=Daboia russelii OX=8707 PE=2 SV=1	15586	25	6	151.57	38
A8CG78|PA2A2_DABSI	Acidic phospholipase A2 DsM-a2/DsM-a2' OS=Daboia siamensis OX=343250 PE=1 SV=1	15586	25	6	151.57	38
B4XT06|SLB7_MACLB	Snaclec B7 (Fragment) OS=Macrovipera lebetina OX=8709 PE=2 SV=1	15036	17	7	150.83	41
tr|Q6A3B4|Q6A3B4_VIPAS	Ammodytin I2(B) variant OS=Vipera aspis atra OX=246182 PE=2 SV=1	15283	22	2	149.13	65
tr|F8S109|F8S109_CROAD	Metalloproteinase 8 (Fragment) OS=Crotalus adamanteus OX=8729 PE=2 SV=1	54615	20	4	148.49	18
tr|A0A1W7RB90|A0A1W7RB90_CROAD	Cadam10_SVMPIII-2 OS=Crotalus adamanteus OX=8729 PE=4 SV=1	68421	20	4	148.49	14
tr|J3S831|J3S831_CROAD	Snake venom metalloproteinase (Type III) 5 OS=Crotalus adamanteus OX=8729 PE=2 SV=1	68434	20	4	148.49	14
tr|A0A1I9KNP6|A0A1I9KNP6_VIPAA	C-type lectin snaclec-1 OS=Vipera ammodytes ammodytes OX=8705 PE=2 SV=1	17626	23	2	148.4	60
tr|A0A6G5ZW78|A0A6G5ZW78_VIPAN	Serine protease 2 OS=Vipera anatolica senliki OX=2604287 PE=2 SV=1	28103	23	3	146.55	39
tr|A0A0B8RNS9|A0A0B8RNS9_BOIIR	Xaa-Pro aminopeptidase 2 OS=Boiga irregularis OX=92519 PE=3 SV=1	76736	25	25	146.1	24
Q9YGJ7|PA2A8_DABPA	Acidic phospholipase A2 VP8 OS=Daboia palaestinae OX=1170828 PE=3 SV=1	15350	24	5	144.84	61
C0HKZ6|SLMA_MACLB	Snaclec macrovipecetin subunit alpha OS=Macrovipera lebetina OX=8709 PE=1 SV=1	15418	13	5	142.37	38
P0DJE2|VM3A_VIPAA	Zinc metalloproteinase-disintegrin-like ammodytagin (Fragment) OS=Vipera ammodytes ammodytes OX=8705 PE=1 SV=3	19902	17	6	140.92	39
tr|A0A1I9KNS3|A0A1I9KNS3_VIPAA	Metalloproteinase of class P-II MPII-3 OS=Vipera ammodytes ammodytes OX=8705 PE=2 SV=1	53069	13	2	140.28	18
Q2YHJ7|PA2B_TRIPE	Basic phospholipase A2 Tpu-G6D49 OS=Trimeresurus puniceus OX=197218 PE=1 SV=1	15699	14	4	139.14	30
Q2YHJ2|PA2B_TRIBO	Basic phospholipase A2 Tbo-G6D49 OS=Trimeresurus borneensis OX=109778 PE=1 SV=1	15742	14	4	139.14	30
tr|A0A6B7FPJ0|A0A6B7FPJ0_VIPAA	Serine proteinase SP-8 OS=Vipera ammodytes ammodytes OX=8705 PE=2 SV=1	28795	21	2	136.3	36
tr|A0A1I9KNR6|A0A1I9KNR6_VIPAA	Metalloproteinase of class P-III MPIII-1 OS=Vipera ammodytes ammodytes OX=8705 PE=2 SV=1	68388	20	6	132.97	14
P82972|VNP_PSEPC	Natriuretic peptide PNP OS=Pseudocerastes persicus OX=47769 PE=1 SV=1	3944	8	7	129.73	59
tr|A0A1I9KNR8|A0A1I9KNR8_VIPAA	Serine proteinase SP-4 OS=Vipera ammodytes ammodytes OX=8705 PE=2 SV=1	28587	20	3	129.64	36
P81743|VM2AB_ERIMA	Disintegrin EMF10B OS=Eristicophis macmahoni OX=110227 PE=1 SV=1	7427	9	2	129.01	76
tr|F8S111|F8S111_CROAD	Metalloproteinase 10 (Fragment) OS=Crotalus adamanteus OX=8729 PE=2 SV=1	43048	11	3	128.22	13
tr|A0A1W7RBB1|A0A1W7RBB1_CROAD	Cadam10_SVMPIII-7 OS=Crotalus adamanteus OX=8729 PE=4 SV=1	69576	11	3	128.22	8
tr|J3RY90|J3RY90_CROAD	Snake venom metalloproteinase (Type III) 6 OS=Crotalus adamanteus OX=8729 PE=2 SV=1	69653	11	3	128.22	8
V5TBK6|VMH4A_VIPAA	Zinc metalloproteinase-disintegrin-like protein H4 subunit A OS=Vipera ammodytes ammodytes OX=8705 PE=1 SV=1	68662	18	9	127.88	12
tr|A0A098LWS4|A0A098LWS4_PYTRG	Amine oxidase OS=Python regius OX=51751 PE=2 SV=1	57250	11	2	126.64	10
Q71QH5|VSP08_TRIST	Snake venom serine protease KN8 OS=Trimeresurus stejnegeri OX=39682 PE=2 SV=1	28176	13	11	125.76	10
Q9PT41|VSPF5_MACLB	Factor V activator OS=Macrovipera lebetina OX=8709 PE=1 SV=1	28595	10	2	124.48	25
tr|A0A6G5ZVU9|A0A6G5ZVU9_VIPAN	Nerve growth factor 1 OS=Vipera anatolica senliki OX=2604287 PE=2 SV=1	27325	11	11	113.59	28
tr|A0A1I9KNN4|A0A1I9KNN4_VIPAA	Serine proteinase SP-3 OS=Vipera ammodytes ammodytes OX=8705 PE=2 SV=1	28168	15	2	112.05	45
tr|E9JG53|E9JG53_ECHCS	Metalloproteinase (Fragment) OS=Echis carinatus sochureki OX=124223 PE=2 SV=1	27821	10	4	107.47	11
tr|E9JG44|E9JG44_ECHCS	Metalloproteinase (Fragment) OS=Echis carinatus sochureki OX=124223 PE=2 SV=1	29963	10	4	107.47	10
tr|A0A6B7FMQ9|A0A6B7FMQ9_VIPAA	Phospholipase B-like OS=Vipera ammodytes ammodytes OX=8705 PE=2 SV=1	64310	10	7	102.49	15
tr|A0A3G1E3T4|A0A3G1E3T4_ECHOC	Venom metalloprotease PIII-SVMP EOC00089 OS=Echis ocellatus OX=99586 PE=4 SV=1	68419	13	2	100.79	10
Q98995|VM2L2_MACLB	Zinc metalloproteinase/disintegrin OS=Macrovipera lebetina OX=8709 PE=1 SV=1	53480	10	5	100.45	6
tr|E9JGA3|E9JGA3_ECHCO	Metalloproteinase (Fragment) OS=Echis coloratus OX=64175 PE=2 SV=1	55138	8	3	98.52	13
Q7LZ09|LEB_MACLB	Lebetin-2-alpha OS=Macrovipera lebetina OX=8709 PE=1 SV=1	3945	5	4	96.38	63
tr|A0A286S0D7|A0A286S0D7_GLOIT	Serine protease 5 OS=Gloydius intermedius OX=44732 GN=SP5 PE=2 SV=1	28715	9	2	91.32	22
tr|E9JG24|E9JG24_ECHCS	Serine protease (Fragment) OS=Echis carinatus sochureki OX=124223 PE=2 SV=1	25724	5	2	89.81	24
C0K3N5|VEGFA_VIPAA	Vascular endothelial growth factor A OS=Vipera ammodytes ammodytes OX=8705 PE=2 SV=1	22460	3	3	84.83	14
tr|A0A0A1WCF9|A0A0A1WCF9_ECHCO	Vascular endothelial growth factor A OS=Echis coloratus OX=64175 PE=2 SV=1	22515	3	3	84.83	14
tr|A0A194ARU4|A0A194ARU4_9SAUR	C-type lectin 5b OS=Agkistrodon piscivorus OX=8715 PE=4 SV=1	18334	3	2	82.32	9
tr|A0A194APX0|A0A194APX0_9SAUR	C-type lectin 5a OS=Agkistrodon piscivorus OX=8715 PE=4 SV=1	18349	3	2	82.32	9
tr|A0A194APN7|A0A194APN7_9SAUR	C-type lectin 5c OS=Agkistrodon piscivorus OX=8715 PE=4 SV=1	18363	3	2	82.32	9
tr|A0A9F2NCF7|A0A9F2NCF7_PYTBI	Chymotrypsinogen 2-like OS=Python bivittatus OX=176946 GN=LOC103054169 PE=3 SV=1	27901	5	2	81.91	12
tr|A0A0A1WDX5|A0A0A1WDX5_ECHCO	C-type lectin E (Fragment) OS=Echis coloratus OX=64175 PE=2 SV=1	11591	5	2	79.88	18
tr|A0A6G5ZW32|A0A6G5ZW32_VIPAN	Serine protease 3 OS=Vipera anatolica senliki OX=2604287 PE=2 SV=1	38021	4	4	74.87	15
tr|A0A0K8RVW8|A0A0K8RVW8_CROHD	Dickkopf-related protein 3-like OS=Crotalus horridus OX=35024 PE=3 SV=1	31385	4	4	72.43	21
tr|J3RZ21|J3RZ21_CROAD	Dickkopf-related protein 3-like OS=Crotalus adamanteus OX=8729 PE=2 SV=1	39484	4	4	72.43	17
tr|A0A8C6XJV4|A0A8C6XJV4_NAJNA	Uncharacterized protein OS=Naja naja OX=35670 PE=3 SV=1	68942	5	3	71.56	6
tr|A0A8C6XIQ9|A0A8C6XIQ9_NAJNA	Uncharacterized protein OS=Naja naja OX=35670 PE=3 SV=1	68844	5	3	71.56	6
tr|A0A8C6XIT1|A0A8C6XIT1_NAJNA	Uncharacterized protein OS=Naja naja OX=35670 PE=3 SV=1	68936	5	3	71.56	6
tr|A0A8C6XLA9|A0A8C6XLA9_NAJNA	Uncharacterized protein OS=Naja naja OX=35670 PE=3 SV=1	69048	5	3	71.56	6
tr|K9JDF6|K9JDF6_DABSI	p31 beta subunit OS=Daboia siamensis OX=343250 PE=2 SV=1	17338	5	3	68.65	27
tr|K9JBV3|K9JBV3_DABRR	p31 beta subunit OS=Daboia russelii limitis OX=338883 PE=2 SV=1	17252	5	3	68.65	27
tr|K9JDK6|K9JDK6_DABRR	p31 beta subunit OS=Daboia russelii russelii OX=31159 PE=2 SV=1	17378	5	3	68.65	27
E5AJX3|VKT_VIPBN	Kunitz-type serine protease inhibitor ki-VN OS=Vipera berus nikolskii OX=1808362 PE=2 SV=1	10426	3	3	67.91	17
tr|Q7LZP2|Q7LZP2_CROAD	Adamalysin II OS=Crotalus adamanteus OX=8729 PE=4 SV=1	23310	3	2	66	7
tr|M9NCR9|M9NCR9_CERGO	Glutaminyl-peptide cyclotransferase OS=Cerrophidion godmani OX=44722 GN=QC-2 PE=2 SV=1	41199	2	2	55.89	6
Q90YA8|QPCT_GLOBL	Glutaminyl-peptide cyclotransferase OS=Gloydius blomhoffii OX=242054 GN=QPCT PE=2 SV=1	42267	2	2	55.89	6
tr|U3TBM3|U3TBM3_OVOOK	Glutaminyl-peptide cyclotransferase (Fragment) OS=Ovophis okinavensis OX=8769 PE=2 SV=1	40742	2	2	55.89	6
tr|M9NCI9|M9NCI9_TRIGS	Glutaminyl-peptide cyclotransferase OS=Trimeresurus gracilis OX=109781 GN=QC PE=2 SV=1	42295	2	2	55.89	6
tr|M9NCI8|M9NCI8_CROAT	Glutaminyl-peptide cyclotransferase OS=Crotalus atrox OX=8730 GN=QC PE=2 SV=1	42299	2	2	55.89	6
tr|J3S3V2|J3S3V2_CROAD	Glutaminyl-peptide cyclotransferase OS=Crotalus adamanteus OX=8729 PE=2 SV=1	42354	2	2	55.89	6
tr|A0A1W7RH88|A0A1W7RH88_AGKCO	Glutaminyl-peptide cyclotransferase OS=Agkistrodon contortrix contortrix OX=8713 PE=3 SV=1	42352	2	2	55.89	6
tr|A0A0K8S0L7|A0A0K8S0L7_CROHD	Glutaminyl-peptide cyclotransferase OS=Crotalus horridus OX=35024 PE=3 SV=1	42370	2	2	55.89	6
tr|U3FZH0|U3FZH0_MICFL	Glutaminyl-peptide cyclotransferase OS=Micrurus fulvius OX=8637 PE=2 SV=1	42150	2	2	55.89	6
tr|T1DH29|T1DH29_CROHD	Glutaminyl-peptide cyclotransferase OS=Crotalus horridus OX=35024 PE=2 SV=1	42369	2	2	55.89	6
tr|M9NCD3|M9NCD3_SISTE	Glutaminyl-peptide cyclotransferase OS=Sistrurus tergeminus OX=8757 GN=QC PE=2 SV=1	42297	2	2	55.89	6
Q9YIB5|QPCT_BOTJA	Glutaminyl-peptide cyclotransferase OS=Bothrops jararaca OX=8724 GN=QPCT PE=2 SV=1	42204	2	2	55.89	6
tr|U3TDL2|U3TDL2_OVOOK	Glutaminyl-peptide cyclotransferase (Fragment) OS=Ovophis okinavensis OX=8769 PE=2 SV=1	42400	2	2	55.89	6
tr|M9NCD2|M9NCD2_CERGO	Glutaminyl-peptide cyclotransferase OS=Cerrophidion godmani OX=44722 GN=QC-1 PE=2 SV=1	40415	2	2	55.89	6
Q90W99|VKT3_PSETT	Kunitz-type serine protease inhibitor textilinin-3 OS=Pseudonaja textilis textilis OX=169397 PE=2 SV=1	9158	2	2	47.31	17
B5L5Q1|VKT7_PSETT	Kunitz-type serine protease inhibitor textilinin-7 OS=Pseudonaja textilis textilis OX=169397 PE=3 SV=1	9031	2	2	47.31	17
tr|R4FKF5|R4FKF5_9SAUR	KP-Ver-3 OS=Vermicella annulata OX=1295044 PE=2 SV=1	9146	2	2	47.31	17
tr|R4G317|R4G317_9SAUR	KP-Pse-7 OS=Pseudonaja modesta OX=340912 PE=2 SV=1	9171	2	2	47.31	17
tr|R4FK61|R4FK61_9SAUR	KP-Pse-5 OS=Pseudonaja modesta OX=340912 PE=2 SV=1	9212	2	2	47.31	17
Q90W98|VKT4_PSETT	Kunitz-type serine protease inhibitor textilinin-4 OS=Pseudonaja textilis textilis OX=169397 PE=2 SV=1	8983	2	2	47.31	17
tr|A0A2D4HLC6|A0A2D4HLC6_MICLE	BPTI/Kunitz inhibitor domain-containing protein (Fragment) OS=Micrurus lemniscatus lemniscatus OX=129467 PE=4 SV=1	12275	2	2	47.31	13
tr|A0A2D4HL84|A0A2D4HL84_MICLE	BPTI/Kunitz inhibitor domain-containing protein (Fragment) OS=Micrurus lemniscatus lemniscatus OX=129467 PE=3 SV=1	13630	2	2	47.31	12
tr|A0A0H3U1V1|A0A0H3U1V1_9SAUR	Phospholipase A2 OS=Trimeresurus popeiorum OX=109786 PE=3 SV=1	15813	2	2	41.46	13

## Sheet: M. xanthina_Trypsin
Protein ID	Protein description	Average Mass	# of matched peptides	# of unique peptides	Protein score (-10LgP)	Proteoin coverage
P11407|PA2BC_VIPAA	Basic phospholipase A2 ammodytoxin C OS=Vipera ammodytes ammodytes OX=8705 PE=1 SV=1	15498	21	16	320.6	36
tr|Q6A363|Q6A363_VIPAP	Ammodytoxin C variant OS=Vipera aspis aspis OX=194601 PE=2 SV=1	15353	21	16	320.6	36
tr|Q6A361|Q6A361_VIPAP	Ammodytoxin C variant OS=Vipera aspis aspis OX=194601 PE=2 SV=1	15468	21	16	320.6	36
P00626|PA2BA_VIPAA	Basic phospholipase A2 ammodytoxin A OS=Vipera ammodytes ammodytes OX=8705 PE=1 SV=2	15531	21	16	320.6	36
P14424|PA2BB_VIPAA	Basic phospholipase A2 ammodytoxin B OS=Vipera ammodytes ammodytes OX=8705 PE=1 SV=2	15529	21	16	320.6	36
tr|Q6A362|Q6A362_VIPAP	Ammodytoxin B isoform OS=Vipera aspis aspis OX=194601 PE=2 SV=1	15529	21	16	320.6	36
tr|Q6A360|Q6A360_VIPAP	Ammodytoxin B isoform OS=Vipera aspis aspis OX=194601 PE=2 SV=1	15559	21	16	320.6	36
A0A6B7FMR5|VMMP3_VIPAA	Disintegrin-like/cysteine-rich protein MPIII-3 OS=Vipera ammodytes ammodytes OX=8705 PE=1 SV=1	36837	24	12	248.03	21
tr|A0A1I9KNT0|A0A1I9KNT0_VIPAA	Metalloproteinase of class P-II MPII-1 OS=Vipera ammodytes ammodytes OX=8705 PE=2 SV=1	53479	17	4	233.03	22
tr|A0A6B7FRF2|A0A6B7FRF2_VIPAA	Amine oxidase OS=Vipera ammodytes ammodytes OX=8705 PE=2 SV=1	57103	28	6	228.61	26
tr|A0A6B7FNN4|A0A6B7FNN4_VIPAA	Metalloproteinase of class P-III MPIII-5 OS=Vipera ammodytes ammodytes OX=8705 PE=2 SV=1	68346	24	6	219.66	29
R4NNL0|VMH3_VIPAA	Zinc metalloproteinase-disintegrin-like protein H3 OS=Vipera ammodytes ammodytes OX=8705 PE=1 SV=1	68546	24	6	219.66	29
P82475|TXVE2_MACLB	Snake venom vascular endothelial growth factor toxin ICPP OS=Macrovipera lebetina OX=8709 PE=1 SV=2	12574	13	13	218.78	47
P0DW97|TXVE_DABPA	Snake venom vascular endothelial growth factor toxin OS=Daboia palaestinae OX=1170828 PE=1 SV=1	12590	13	13	218.78	47
tr|Q6A3L1|Q6A3L1_VIPAP	Ammodytin I1(E) isoform OS=Vipera aspis aspis OX=194601 PE=2 SV=1	15428	16	2	212.96	41
Q4VM08|VM3VA_MACLB	Zinc metalloproteinase-disintegrin-like VLAIP-A OS=Macrovipera lebetina OX=8709 PE=1 SV=1	68710	19	3	203.29	23
tr|A0A1I9KNR7|A0A1I9KNR7_VIPAA	Disintegrin Dis-1 OS=Vipera ammodytes ammodytes OX=8705 PE=2 SV=1	13997	17	17	198.71	59
tr|A0A1I9KNR4|A0A1I9KNR4_VIPAA	Disintegrin Dis-1 OS=Vipera ammodytes ammodytes OX=8705 PE=2 SV=1	13983	17	17	198.71	59
tr|A0A6B7FMR4|A0A6B7FMR4_VIPAA	Metalloproteinase of class P-III MPIII-4 OS=Vipera ammodytes ammodytes OX=8705 PE=2 SV=1	68844	9	3	185.16	10
tr|A0A1J0CZN1|A0A1J0CZN1_VIPAA	SVMPi-1 OS=Vipera ammodytes ammodytes OX=8705 PE=2 SV=1	20075	10	6	182.32	14
tr|A0A6B7FPT0|A0A6B7FPT0_VIPAA	Endogenous tripeptide metalloproteinase inhibitor MPi-5 OS=Vipera ammodytes ammodytes OX=8705 PE=2 SV=1	15039	10	6	182.32	18
Q9YGJ7|PA2A8_DABPA	Acidic phospholipase A2 VP8 OS=Daboia palaestinae OX=1170828 PE=3 SV=1	15350	14	2	181.06	50
W8EFS0|V5NTD_MACLB	Snake venom 5'-nucleotidase (Fragment) OS=Macrovipera lebetina OX=8709 PE=1 SV=1	45031	11	3	172.19	25
tr|A0A6B7FQF8|A0A6B7FQF8_VIPAA	Serine proteinase SP-6 OS=Vipera ammodytes ammodytes OX=8705 PE=2 SV=1	28317	11	6	168.27	26
tr|A0A1I9KNP1|A0A1I9KNP1_VIPAA	C-type lectin snaclec-4 OS=Vipera ammodytes ammodytes OX=8705 PE=2 SV=1	17505	10	4	166.33	39
tr|A0A1I9KNN1|A0A1I9KNN1_VIPAA	C-type lectin snaclec-3 OS=Vipera ammodytes ammodytes OX=8705 PE=2 SV=1	17398	9	3	157.99	26
tr|A0A1I9KNR8|A0A1I9KNR8_VIPAA	Serine proteinase SP-4 OS=Vipera ammodytes ammodytes OX=8705 PE=2 SV=1	28587	12	2	157.5	24
tr|A0A1I9KNR6|A0A1I9KNR6_VIPAA	Metalloproteinase of class P-III MPIII-1 OS=Vipera ammodytes ammodytes OX=8705 PE=2 SV=1	68388	7	5	157.29	8
tr|K9JBU0|K9JBU0_DABRR	Dabocetin alpha subunit OS=Daboia russelii russelii OX=31159 PE=2 SV=1	17493	8	2	154.53	34
tr|A0A1J0CZM7|A0A1J0CZM7_VIPAA	Snaclec-7 OS=Vipera ammodytes ammodytes OX=8705 PE=2 SV=1	17285	7	2	150.98	32
tr|E9JG34|E9JG34_ECHCS	Metalloproteinase OS=Echis carinatus sochureki OX=124223 PE=2 SV=1	69245	13	2	150.22	11
tr|A0A6G5ZVU9|A0A6G5ZVU9_VIPAN	Nerve growth factor 1 OS=Vipera anatolica senliki OX=2604287 PE=2 SV=1	27325	6	6	146.56	22
tr|A0A6B7FPT6|A0A6B7FPT6_VIPAA	Vascular nerve growth factor OS=Vipera ammodytes ammodytes OX=8705 PE=2 SV=1	26649	6	6	146.56	22
B4XSY5|SLAA_MACLB	Snaclec A10 OS=Macrovipera lebetina OX=8709 PE=2 SV=1	17731	5	2	143.68	27
B4XSY6|SLAB_MACLB	Snaclec A11 OS=Macrovipera lebetina OX=8709 PE=2 SV=1	17738	5	2	143.68	27
Q9PT40|VSPH2_MACLB	Snake venom serine protease homolog 2 OS=Macrovipera lebetina OX=8709 PE=2 SV=1	28894	9	2	143.28	27
tr|A0A6B7FMQ9|A0A6B7FMQ9_VIPAA	Phospholipase B-like OS=Vipera ammodytes ammodytes OX=8705 PE=2 SV=1	64310	6	6	138.09	7
P0DJL4|SLA_DABPA	Snaclec VP12 subunit A (Fragment) OS=Daboia palaestinae OX=1170828 PE=1 SV=1	12125	5	5	136.18	30
E0Y418|VSP1_MACLB	Serine protease VLSP-1 OS=Macrovipera lebetina OX=8709 PE=2 SV=1	28702	7	5	136.13	19
tr|F2Q6G0|F2Q6G0_DEIAC	Cysteine-rich seceretory protein Da-CRPa (Fragment) OS=Deinagkistrodon acutus OX=36307 PE=2 SV=1	24743	6	2	134.48	22
tr|F2Q6F1|F2Q6F1_CROVI	Cysteine-rich seceretory protein Cv-CRP (Fragment) OS=Crotalus viridis OX=8739 PE=2 SV=1	24861	6	2	134.48	22
tr|F2Q6G1|F2Q6G1_DEIAC	Cysteine-rich seceretory protein Da-CRPb (Fragment) OS=Deinagkistrodon acutus OX=36307 PE=2 SV=1	24748	6	2	134.48	22
tr|A0A0B8RNS9|A0A0B8RNS9_BOIIR	Xaa-Pro aminopeptidase 2 OS=Boiga irregularis OX=92519 PE=3 SV=1	76736	4	4	132.01	5
tr|A0A1L8D689|A0A1L8D689_BOTAT	Snake venom metalloproteinase OS=Bothrops atrox OX=8725 PE=2 SV=1	67598	4	2	130.23	5
tr|K9JBU4|K9JBU4_DABSI	p68 beta subunit OS=Daboia siamensis OX=343250 PE=2 SV=1	16910	6	4	129.87	34
tr|K9JCR4|K9JCR4_DABRR	p68 beta subunit OS=Daboia russelii limitis OX=338883 PE=2 SV=1	16910	6	4	129.87	34
P0DJL5|SLB_DABPA	Snaclec VP12 subunit B OS=Daboia palaestinae OX=1170828 PE=1 SV=1	15157	7	2	129.74	34
P83253|DID1A_MACLB	Disintegrin lebein-1-alpha OS=Macrovipera lebetina OX=8709 PE=1 SV=2	12099	3	2	129.25	40
tr|A0A1I9KNL5|A0A1I9KNL5_VIPAA	Serine proteinase SP-2 OS=Vipera ammodytes ammodytes OX=8705 PE=2 SV=1	28885	11	5	127.73	20
Q71QH5|VSP08_TRIST	Snake venom serine protease KN8 OS=Trimeresurus stejnegeri OX=39682 PE=2 SV=1	28176	6	5	125.4	9
Q98995|VM2L2_MACLB	Zinc metalloproteinase/disintegrin OS=Macrovipera lebetina OX=8709 PE=1 SV=1	53480	6	2	124.88	6
B4XT06|SLB7_MACLB	Snaclec B7 (Fragment) OS=Macrovipera lebetina OX=8709 PE=2 SV=1	15036	7	6	121.55	18
Q7LZ09|LEB_MACLB	Lebetin-2-alpha OS=Macrovipera lebetina OX=8709 PE=1 SV=1	3945	4	4	117.03	37
P00992|VKT3_VIPAA	Kunitz-type serine protease inhibitor 3 OS=Vipera ammodytes ammodytes OX=8705 PE=1 SV=2	10330	6	5	116.96	32
E5AJX3|VKT_VIPBN	Kunitz-type serine protease inhibitor ki-VN OS=Vipera berus nikolskii OX=1808362 PE=2 SV=1	10426	6	5	116.96	32
tr|K9JDF6|K9JDF6_DABSI	p31 beta subunit OS=Daboia siamensis OX=343250 PE=2 SV=1	17338	3	3	112.23	17
tr|K9JBV3|K9JBV3_DABRR	p31 beta subunit OS=Daboia russelii limitis OX=338883 PE=2 SV=1	17252	3	3	112.23	17
tr|K9JDK6|K9JDK6_DABRR	p31 beta subunit OS=Daboia russelii russelii OX=31159 PE=2 SV=1	17378	3	3	112.23	17
tr|E9JG53|E9JG53_ECHCS	Metalloproteinase (Fragment) OS=Echis carinatus sochureki OX=124223 PE=2 SV=1	27821	2	2	89.98	6
tr|E9JG44|E9JG44_ECHCS	Metalloproteinase (Fragment) OS=Echis carinatus sochureki OX=124223 PE=2 SV=1	29963	2	2	89.98	6
P82972|VNP_PSEPC	Natriuretic peptide PNP OS=Pseudocerastes persicus OX=47769 PE=1 SV=1	3944	3	3	89.77	73
C0HKZ6|SLMA_MACLB	Snaclec macrovipecetin subunit alpha OS=Macrovipera lebetina OX=8709 PE=1 SV=1	15418	3	2	86.44	32
tr|T2HS00|T2HS00_PROFL	Prosaposin OS=Protobothrops flavoviridis OX=88087 PE=2 SV=1	58564	2	2	82.13	4
tr|A0A8T1N163|A0A8T1N163_BOTJA	Snake venom serine protease OS=Bothrops jararaca OX=8724 GN=JKG30_000013 PE=3 SV=1	28659	3	2	75.14	8
Q7ZT98|CRVP_OPHHA	Cysteine-rich venom protein ophanin OS=Ophiophagus hannah OX=8665 PE=1 SV=1	26869	2	2	74.51	5
tr|V8N8B4|V8N8B4_OPHHA	ShKT domain-containing protein OS=Ophiophagus hannah OX=8665 GN=L345_16118 PE=3 SV=1	24779	2	2	74.51	5
tr|C1JZW4|C1JZW4_OPHHA	Opharin OS=Ophiophagus hannah OX=8665 PE=2 SV=1	26305	2	2	74.51	5
Q8AVA3|CRVP_PSEPO	Cysteine-rich venom protein pseudecin OS=Pseudechis porphyriacus OX=8671 PE=1 SV=1	26452	2	2	74.51	5
Q8AVA4|CRVP_PSEAU	Cysteine-rich venom protein pseudechetoxin OS=Pseudechis australis OX=8670 PE=1 SV=1	26475	2	2	74.51	5
tr|A0A1D8BAX5|A0A1D8BAX5_PSEPP	Cysteine-rich secretory protein OS=Pseudechis papuanus OX=61265 GN=CRiSP1 PE=2 SV=1	26459	2	2	74.51	5
A6MFK9|CRVP_DEMVE	Cysteine-rich venom protein OS=Demansia vestigiata OX=412038 PE=2 SV=1	26470	2	2	74.51	5
tr|A0A098LWY0|A0A098LWY0_9SAUR	Cysteine-rich secretory protein A OS=Opheodrys aestivus OX=186591 PE=2 SV=1	26749	2	2	74.51	5
tr|A0A346CM44|A0A346CM44_9SAUR	Metalloproteinase 17 (Fragment) OS=Ahaetulla prasina OX=499056 PE=2 SV=1	68144	2	2	73.29	3
tr|A0A346CM36|A0A346CM36_9SAUR	Metalloproteinase 31 (Fragment) OS=Ahaetulla prasina OX=499056 PE=2 SV=1	68120	2	2	73.29	3
tr|A0A346CM27|A0A346CM27_9SAUR	Metalloproteinase 35 (Fragment) OS=Ahaetulla prasina OX=499056 PE=2 SV=1	68041	2	2	73.29	3
tr|A0A346CM41|A0A346CM41_9SAUR	Metalloproteinase 37 (Fragment) OS=Ahaetulla prasina OX=499056 PE=2 SV=1	68148	2	2	73.29	3
tr|A0A346CM32|A0A346CM32_9SAUR	Metalloproteinase 22 (Fragment) OS=Ahaetulla prasina OX=499056 PE=2 SV=1	68152	2	2	73.29	3
tr|A0A1J0CZM4|A0A1J0CZM4_VIPAA	Snaclec-5 OS=Vipera ammodytes ammodytes OX=8705 PE=2 SV=1	18101	2	2	71.92	12
tr|A0A1J0CZM8|A0A1J0CZM8_VIPAA	Snaclec-6 OS=Vipera ammodytes ammodytes OX=8705 PE=2 SV=1	18052	2	2	71.92	12
tr|A0A2D4G9B5|A0A2D4G9B5_MICCO	C-type lectin domain-containing protein (Fragment) OS=Micrurus corallinus OX=54390 PE=3 SV=1	11772	2	2	68.26	10
A3QVN6|HYAL_ECHPL	Hyaluronidase OS=Echis pyramidum leakeyi OX=38415 PE=2 SV=1	52688	2	2	66.5	5
A3QVN3|HYAL1_CERCE	Hyaluronidase-1 OS=Cerastes cerastes OX=8697 PE=2 SV=1	52654	2	2	66.5	5
A3QVN5|HYAL4_CERCE	Hyaluronidase-4 OS=Cerastes cerastes OX=8697 PE=2 SV=1	52622	2	2	66.5	5
A3QVN4|HYAL3_CERCE	Hyaluronidase-3 OS=Cerastes cerastes OX=8697 PE=2 SV=1	52616	2	2	66.5	5
tr|A8HR02|A8HR02_DEIAC	Thrombin-like protein (Fragment) OS=Deinagkistrodon acutus OX=36307 PE=2 SV=1	26007	2	2	65.32	4
tr|B3V4Z6|B3V4Z6_DEIAC	Thrombin-like protein DAV-WY OS=Deinagkistrodon acutus OX=36307 PE=2 SV=1	28705	2	2	65.32	4
W8E7D1|PDE_MACLB	Venom phosphodiesterase OS=Macrovipera lebetina OX=8709 PE=1 SV=1	96181	2	2	58.4	3
P0DMT1|PA2HS_ECHPL	Phospholipase A2 homolog EPL_00195 OS=Echis pyramidum leakeyi OX=38415 PE=1 SV=1	13712	2	2	52.82	15
P0DMT3|PA2HS_ECHCO	Phospholipase A2 homolog ECO_00035 OS=Echis coloratus OX=64175 PE=1 SV=1	13706	2	2	52.82	15
tr|A0A140YIG3|A0A140YIG3_ECHCA	Basic phospholipase A2 OS=Echis carinatus OX=40353 PE=2 SV=1	15601	2	2	52.82	13
tr|A0A0A1WC82|A0A0A1WC82_ECHCO	Phospholipase A2 Group IIA c OS=Echis coloratus OX=64175 PE=2 SV=1	15595	2	2	52.82	13
tr|A0A0A1WDL6|A0A0A1WDL6_ECHCO	Phospholipase A2 Group IIA b (Fragment) OS=Echis coloratus OX=64175 PE=2 SV=1	16636	2	2	52.82	12
tr|A0A0A1WDQ3|A0A0A1WDQ3_ECHCO	Phospholipase A2 Group IIA a (Fragment) OS=Echis coloratus OX=64175 PE=2 SV=1	16954	2	2	52.82	12

## Sheet: M. xanthina_MELD
Protein ID	Protein description	Average Mass	# of matched peptides	# of unique peptides	Protein score (-10LgP)	Proteoin coverage
tr|Q6A363|Q6A363_VIPAP	Ammodytoxin C variant OS=Vipera aspis aspis OX=194601 PE=2 SV=1	15353	42	26	269.04	55
tr|Q6A361|Q6A361_VIPAP	Ammodytoxin C variant OS=Vipera aspis aspis OX=194601 PE=2 SV=1	15468	42	26	269.04	55
tr|Q6A362|Q6A362_VIPAP	Ammodytoxin B isoform OS=Vipera aspis aspis OX=194601 PE=2 SV=1	15529	42	26	269.04	55
P14424|PA2BB_VIPAA	Basic phospholipase A2 ammodytoxin B OS=Vipera ammodytes ammodytes OX=8705 PE=1 SV=2	15529	42	26	269.04	55
P00626|PA2BA_VIPAA	Basic phospholipase A2 ammodytoxin A OS=Vipera ammodytes ammodytes OX=8705 PE=1 SV=2	15531	42	26	269.04	55
tr|Q6A360|Q6A360_VIPAP	Ammodytoxin B isoform OS=Vipera aspis aspis OX=194601 PE=2 SV=1	15559	42	26	269.04	55
P11407|PA2BC_VIPAA	Basic phospholipase A2 ammodytoxin C OS=Vipera ammodytes ammodytes OX=8705 PE=1 SV=1	15498	42	26	269.04	55
P31854|PA2B_VIPBB	Basic phospholipase A2 Pla2Vb OS=Vipera berus berus OX=31156 PE=1 SV=2	15716	45	7	217.53	64
A0A6B7FMR5|VMMP3_VIPAA	Disintegrin-like/cysteine-rich protein MPIII-3 OS=Vipera ammodytes ammodytes OX=8705 PE=1 SV=1	36837	37	25	207.54	36
tr|A0A6B7FNN4|A0A6B7FNN4_VIPAA	Metalloproteinase of class P-III MPIII-5 OS=Vipera ammodytes ammodytes OX=8705 PE=2 SV=1	68346	34	4	200.54	38
R4NNL0|VMH3_VIPAA	Zinc metalloproteinase-disintegrin-like protein H3 OS=Vipera ammodytes ammodytes OX=8705 PE=1 SV=1	68546	34	4	200.54	38
Q4VM08|VM3VA_MACLB	Zinc metalloproteinase-disintegrin-like VLAIP-A OS=Macrovipera lebetina OX=8709 PE=1 SV=1	68710	33	3	197.33	31
tr|A0A1I9KNT0|A0A1I9KNT0_VIPAA	Metalloproteinase of class P-II MPII-1 OS=Vipera ammodytes ammodytes OX=8705 PE=2 SV=1	53479	24	6	193.08	34
tr|A0A6B7FRF2|A0A6B7FRF2_VIPAA	Amine oxidase OS=Vipera ammodytes ammodytes OX=8705 PE=2 SV=1	57103	45	6	192.68	39
tr|A0A1J0CZN1|A0A1J0CZN1_VIPAA	SVMPi-1 OS=Vipera ammodytes ammodytes OX=8705 PE=2 SV=1	20075	13	9	178.62	16
tr|A0A6B7FPT0|A0A6B7FPT0_VIPAA	Endogenous tripeptide metalloproteinase inhibitor MPi-5 OS=Vipera ammodytes ammodytes OX=8705 PE=2 SV=1	15039	13	9	178.62	20
B4XSY5|SLAA_MACLB	Snaclec A10 OS=Macrovipera lebetina OX=8709 PE=2 SV=1	17731	17	8	177.04	43
tr|Q6A3D9|Q6A3D9_VIPAP	Ammodytin I2(A'') isoform OS=Vipera aspis aspis OX=194601 PE=2 SV=1	15281	30	7	176.58	63
tr|Q6A3B1|Q6A3B1_VIPAA	Ammodytin I2(A') isoform OS=Vipera ammodytes ammodytes OX=8705 PE=2 SV=1	15322	30	7	176.58	63
tr|Q6YCN7|Q6YCN7_VIPBB	Ammodytin I2 OS=Vipera berus berus OX=31156 GN=AmtI2 PE=2 SV=1	15309	30	7	176.58	63
tr|Q6A3F2|Q6A3F2_VIPAZ	Ammodytin I2(A) isoform OS=Vipera aspis zinnikeri OX=55427 PE=2 SV=1	15309	30	7	176.58	63
tr|Q6A3F4|Q6A3F4_VIPAP	Ammodytin I2(A) variant OS=Vipera aspis aspis OX=194601 PE=2 SV=1	15279	30	7	176.58	63
tr|Q6YCN8|Q6YCN8_VIPAS	Ammodytin I2 OS=Vipera aspis OX=8706 GN=AmtI2 PE=3 SV=1	15309	30	7	176.58	63
tr|Q6YCN9|Q6YCN9_VIPAP	Ammodytin I2 OS=Vipera aspis aspis OX=194601 GN=AmtI2 PE=2 SV=1	15309	30	7	176.58	63
tr|Q6A3D1|Q6A3D1_VIPAP	Ammodytin I2(A) variant OS=Vipera aspis aspis OX=194601 PE=2 SV=1	15323	30	7	176.58	63
P34180|PA2N2_VIPAA	Neutral phospholipase A2 ammodytin I2 OS=Vipera ammodytes ammodytes OX=8705 PE=1 SV=2	15309	30	7	176.58	63
tr|Q6A3C9|Q6A3C9_VIPAP	Ammodytin I2(A) variant OS=Vipera aspis aspis OX=194601 PE=2 SV=1	15324	30	7	176.58	63
tr|Q6A3C7|Q6A3C7_VIPAM	Ammodytin I2(A) isoform OS=Vipera ammodytes ruffoi OX=246549 PE=2 SV=1	15309	30	7	176.58	63
tr|Q6A3A9|Q6A3A9_VIPAA	Ammodytin I2(A) isoform OS=Vipera ammodytes ammodytes OX=8705 PE=2 SV=1	15309	30	7	176.58	63
tr|Q6A3E3|Q6A3E3_VIPAP	Ammodytin I2(A''') isoform OS=Vipera aspis aspis OX=194601 PE=2 SV=1	15293	30	7	176.58	63
A8CG87|PA2A2_DABRR	Acidic phospholipase A2 Drk-a2 OS=Daboia russelii OX=8707 PE=2 SV=1	15586	27	5	170.56	46
A8CG78|PA2A2_DABSI	Acidic phospholipase A2 DsM-a2/DsM-a2' OS=Daboia siamensis OX=343250 PE=1 SV=1	15586	27	5	170.56	46
tr|A0A6B7FMR4|A0A6B7FMR4_VIPAA	Metalloproteinase of class P-III MPIII-4 OS=Vipera ammodytes ammodytes OX=8705 PE=2 SV=1	68844	23	5	170.23	22
E0Y418|VSP1_MACLB	Serine protease VLSP-1 OS=Macrovipera lebetina OX=8709 PE=2 SV=1	28702	33	18	167.26	49
P82475|TXVE2_MACLB	Snake venom vascular endothelial growth factor toxin ICPP OS=Macrovipera lebetina OX=8709 PE=1 SV=2	12574	15	15	165.44	54
P0DW97|TXVE_DABPA	Snake venom vascular endothelial growth factor toxin OS=Daboia palaestinae OX=1170828 PE=1 SV=1	12590	15	15	165.44	54
W8EFS0|V5NTD_MACLB	Snake venom 5'-nucleotidase (Fragment) OS=Macrovipera lebetina OX=8709 PE=1 SV=1	45031	23	4	163.22	43
tr|K9JBU4|K9JBU4_DABSI	p68 beta subunit OS=Daboia siamensis OX=343250 PE=2 SV=1	16910	20	6	159.77	53
tr|K9JCR4|K9JCR4_DABRR	p68 beta subunit OS=Daboia russelii limitis OX=338883 PE=2 SV=1	16910	20	6	159.77	53
tr|A0A6B7FQF8|A0A6B7FQF8_VIPAA	Serine proteinase SP-6 OS=Vipera ammodytes ammodytes OX=8705 PE=2 SV=1	28317	28	6	157.47	53
C0HKZ6|SLMA_MACLB	Snaclec macrovipecetin subunit alpha OS=Macrovipera lebetina OX=8709 PE=1 SV=1	15418	18	9	155.91	70
B4XSY8|SLAD_MACLB	Snaclec A13 OS=Macrovipera lebetina OX=8709 PE=2 SV=1	15308	19	4	155.23	66
B4XSY7|SLAC_MACLB	Snaclec A12 OS=Macrovipera lebetina OX=8709 PE=2 SV=1	17717	19	4	155.23	56
tr|A0A6G5ZVX7|A0A6G5ZVX7_VIPAN	Serine protease 7 OS=Vipera anatolica senliki OX=2604287 PE=2 SV=1	28928	23	2	153.76	42
tr|A0A6G5ZUR6|A0A6G5ZUR6_VIPAN	Serine protease 6 OS=Vipera anatolica senliki OX=2604287 PE=2 SV=1	28914	23	2	153.76	42
A0A1I9KNP0|VSPH1_VIPAA	Vaa serine proteinase homolog 1 OS=Vipera ammodytes ammodytes OX=8705 PE=1 SV=1	28928	23	2	153.76	42
tr|A0A6B7FMQ9|A0A6B7FMQ9_VIPAA	Phospholipase B-like OS=Vipera ammodytes ammodytes OX=8705 PE=2 SV=1	64310	18	9	153.11	28
tr|A0A1I9KNN1|A0A1I9KNN1_VIPAA	C-type lectin snaclec-3 OS=Vipera ammodytes ammodytes OX=8705 PE=2 SV=1	17398	17	3	152.21	50
tr|A0A1J0CZM7|A0A1J0CZM7_VIPAA	Snaclec-7 OS=Vipera ammodytes ammodytes OX=8705 PE=2 SV=1	17285	17	5	150.39	64
tr|A0A0B8RNS9|A0A0B8RNS9_BOIIR	Xaa-Pro aminopeptidase 2 OS=Boiga irregularis OX=92519 PE=3 SV=1	76736	18	18	149.12	21
P0DJL4|SLA_DABPA	Snaclec VP12 subunit A (Fragment) OS=Daboia palaestinae OX=1170828 PE=1 SV=1	12125	17	10	148.5	75
tr|A0A1I9KNS3|A0A1I9KNS3_VIPAA	Metalloproteinase of class P-II MPII-3 OS=Vipera ammodytes ammodytes OX=8705 PE=2 SV=1	53069	14	2	147.61	22
Q9PT40|VSPH2_MACLB	Snake venom serine protease homolog 2 OS=Macrovipera lebetina OX=8709 PE=2 SV=1	28894	20	2	147.15	40
tr|Q6A351|Q6A351_VIPAZ	Vaspin basic subunit variant OS=Vipera aspis zinnikeri OX=55427 PE=2 SV=1	15638	10	2	146.05	19
B4XT06|SLB7_MACLB	Snaclec B7 (Fragment) OS=Macrovipera lebetina OX=8709 PE=2 SV=1	15036	13	5	144.12	44
tr|A0A194APV2|A0A194APV2_9SAUR	L-amino-acid oxidase OS=Agkistrodon piscivorus OX=8715 PE=3 SV=1	58647	17	3	142.62	18
tr|K9JBU0|K9JBU0_DABRR	Dabocetin alpha subunit OS=Daboia russelii russelii OX=31159 PE=2 SV=1	17493	14	2	142.53	45
P0DJL5|SLB_DABPA	Snaclec VP12 subunit B OS=Daboia palaestinae OX=1170828 PE=1 SV=1	15157	23	4	142.39	74
tr|A0A1I9KNL5|A0A1I9KNL5_VIPAA	Serine proteinase SP-2 OS=Vipera ammodytes ammodytes OX=8705 PE=2 SV=1	28885	19	12	141.31	40
tr|K9JDF2|K9JDF2_DABRR	p68 alpha subunit OS=Daboia russelii limitis OX=338883 PE=2 SV=1	18108	15	2	139.31	46
tr|K9JBV0|K9JBV0_DABSI	p68 alpha subunit OS=Daboia siamensis OX=343250 PE=2 SV=1	17996	15	2	139.31	46
tr|A0A1I9KNP1|A0A1I9KNP1_VIPAA	C-type lectin snaclec-4 OS=Vipera ammodytes ammodytes OX=8705 PE=2 SV=1	17505	21	2	138.42	53
tr|A0A1I9KNR7|A0A1I9KNR7_VIPAA	Disintegrin Dis-1 OS=Vipera ammodytes ammodytes OX=8705 PE=2 SV=1	13997	14	12	136	48
tr|A0A1I9KNR4|A0A1I9KNR4_VIPAA	Disintegrin Dis-1 OS=Vipera ammodytes ammodytes OX=8705 PE=2 SV=1	13983	14	12	136	48
tr|A0A1J0CZM4|A0A1J0CZM4_VIPAA	Snaclec-5 OS=Vipera ammodytes ammodytes OX=8705 PE=2 SV=1	18101	13	6	133.16	44
tr|A0A1J0CZM8|A0A1J0CZM8_VIPAA	Snaclec-6 OS=Vipera ammodytes ammodytes OX=8705 PE=2 SV=1	18052	13	6	133.16	44
E0Y421|VSPY_MACLB	Chymotrypsin-like protease VLCTLP OS=Macrovipera lebetina OX=8709 PE=1 SV=1	28278	11	3	133.11	46
tr|F8S109|F8S109_CROAD	Metalloproteinase 8 (Fragment) OS=Crotalus adamanteus OX=8729 PE=2 SV=1	54615	13	2	127.49	14
tr|A0A1W7RB90|A0A1W7RB90_CROAD	Cadam10_SVMPIII-2 OS=Crotalus adamanteus OX=8729 PE=4 SV=1	68421	13	2	127.49	11
tr|J3S831|J3S831_CROAD	Snake venom metalloproteinase (Type III) 5 OS=Crotalus adamanteus OX=8729 PE=2 SV=1	68434	13	2	127.49	11
tr|A0A6B7FMP6|A0A6B7FMP6_VIPAA	C-type lectin-like Snaclec-9 OS=Vipera ammodytes ammodytes OX=8705 PE=2 SV=1	18081	11	3	127.17	42
tr|A0A1I9KNR6|A0A1I9KNR6_VIPAA	Metalloproteinase of class P-III MPIII-1 OS=Vipera ammodytes ammodytes OX=8705 PE=2 SV=1	68388	10	3	125.5	12
tr|A0A1I9KNR8|A0A1I9KNR8_VIPAA	Serine proteinase SP-4 OS=Vipera ammodytes ammodytes OX=8705 PE=2 SV=1	28587	16	3	125.38	34
P31100|PA2A7_DABSI	Acidic phospholipase A2 RV-7 OS=Daboia siamensis OX=343250 PE=1 SV=1	15421	9	3	124.57	18
tr|B3RFI6|B3RFI6_DABRR	phospholipase A2 OS=Daboia russelii limitis OX=338883 PE=2 SV=1	15421	9	3	124.57	18
tr|B2YHV5|B2YHV5_DABSI	phospholipase A2 OS=Daboia siamensis OX=343250 GN=PLA2S3 PE=3 SV=1	15479	9	3	124.57	18
tr|A0A6G5ZVU9|A0A6G5ZVU9_VIPAN	Nerve growth factor 1 OS=Vipera anatolica senliki OX=2604287 PE=2 SV=1	27325	8	8	121.78	18
P25428|NGFV_MACLB	Venom nerve growth factor OS=Macrovipera lebetina OX=8709 PE=1 SV=2	27318	8	8	121.78	18
tr|A0A098LWS4|A0A098LWS4_PYTRG	Amine oxidase OS=Python regius OX=51751 PE=2 SV=1	57250	7	2	121.03	8
B4XSZ3|SLA3_MACLB	Snaclec A3 (Fragment) OS=Macrovipera lebetina OX=8709 PE=2 SV=1	17937	8	2	117.87	39
Q98995|VM2L2_MACLB	Zinc metalloproteinase/disintegrin OS=Macrovipera lebetina OX=8709 PE=1 SV=1	53480	9	4	104.98	9
Q71QH5|VSP08_TRIST	Snake venom serine protease KN8 OS=Trimeresurus stejnegeri OX=39682 PE=2 SV=1	28176	7	7	102.49	6
E5AJX3|VKT_VIPBN	Kunitz-type serine protease inhibitor ki-VN OS=Vipera berus nikolskii OX=1808362 PE=2 SV=1	10426	3	3	98.07	17
tr|E9JG44|E9JG44_ECHCS	Metalloproteinase (Fragment) OS=Echis carinatus sochureki OX=124223 PE=2 SV=1	29963	7	4	96.04	7
tr|E9JG53|E9JG53_ECHCS	Metalloproteinase (Fragment) OS=Echis carinatus sochureki OX=124223 PE=2 SV=1	27821	7	4	96.04	7
V5TBK6|VMH4A_VIPAA	Zinc metalloproteinase-disintegrin-like protein H4 subunit A OS=Vipera ammodytes ammodytes OX=8705 PE=1 SV=1	68662	7	2	93.44	6
tr|A0A6B7FRK6|A0A6B7FRK6_VIPAA	Metalloproteinase of class P-III MPIII-2 OS=Vipera ammodytes ammodytes OX=8705 PE=2 SV=1	69218	8	2	92.24	7
tr|A0A8T1N163|A0A8T1N163_BOTJA	Snake venom serine protease OS=Bothrops jararaca OX=8724 GN=JKG30_000013 PE=3 SV=1	28659	5	2	89.79	12
Q27J47|VSPPA_LACMU	Venom plasminogen activator LV-PA OS=Lachesis muta muta OX=8753 PE=1 SV=1	28062	7	3	87.72	23
B4XT01|SLB2_MACLB	Snaclec B2 OS=Macrovipera lebetina OX=8709 PE=2 SV=1	16581	3	2	86.14	20
B4XT02|SLB3_MACLB	Snaclec B3/B5 OS=Macrovipera lebetina OX=8709 PE=2 SV=1	16675	3	2	86.14	20
B4XT03|SLB4_MACLB	Snaclec B4 OS=Macrovipera lebetina OX=8709 PE=2 SV=1	16641	3	2	86.14	20
B4XT00|SLB1_MACLB	Snaclec B1 OS=Macrovipera lebetina OX=8709 PE=2 SV=1	16642	3	2	86.14	20
Q6T7B5|SL3_BITGA	Snaclec 3 OS=Bitis gabonica OX=8694 PE=2 SV=1	18095	4	2	78.4	10
tr|A0A194ARU4|A0A194ARU4_9SAUR	C-type lectin 5b OS=Agkistrodon piscivorus OX=8715 PE=4 SV=1	18334	2	2	76.56	9
tr|A0A194APX0|A0A194APX0_9SAUR	C-type lectin 5a OS=Agkistrodon piscivorus OX=8715 PE=4 SV=1	18349	2	2	76.56	9
tr|A0A194APN7|A0A194APN7_9SAUR	C-type lectin 5c OS=Agkistrodon piscivorus OX=8715 PE=4 SV=1	18363	2	2	76.56	9
C0K3N5|VEGFA_VIPAA	Vascular endothelial growth factor A OS=Vipera ammodytes ammodytes OX=8705 PE=2 SV=1	22460	2	2	75.55	6
tr|A0A0A1WCF9|A0A0A1WCF9_ECHCO	Vascular endothelial growth factor A OS=Echis coloratus OX=64175 PE=2 SV=1	22515	2	2	75.55	6
tr|A0A182C5X2|A0A182C5X2_9SAUR	Vascular Endothelial Growth Factor OS=Phalotris mertensi OX=1260334 PE=3 SV=1	22605	2	2	75.55	6
tr|J3S9B2|J3S9B2_CROAD	Prosaposin OS=Crotalus adamanteus OX=8729 PE=2 SV=1	58013	3	3	61.84	5
tr|T2HS00|T2HS00_PROFL	Prosaposin OS=Protobothrops flavoviridis OX=88087 PE=2 SV=1	58564	3	3	61.84	5
tr|A8HR02|A8HR02_DEIAC	Thrombin-like protein (Fragment) OS=Deinagkistrodon acutus OX=36307 PE=2 SV=1	26007	2	2	53.48	4
tr|B3V4Z6|B3V4Z6_DEIAC	Thrombin-like protein DAV-WY OS=Deinagkistrodon acutus OX=36307 PE=2 SV=1	28705	2	2	53.48	4

## Sheet: M. albizona_Trypsin
Protein ID	Protein description	Average Mass	# of matched peptides	# of unique peptides	Protein score (-10LgP)	Proteoin coverage
P11407|PA2BC_VIPAA	Basic phospholipase A2 ammodytoxin C OS=Vipera ammodytes ammodytes OX=8705 PE=1 SV=1	15498	21	16	320.6	36
tr|Q6A363|Q6A363_VIPAP	Ammodytoxin C variant OS=Vipera aspis aspis OX=194601 PE=2 SV=1	15353	21	16	320.6	36
tr|Q6A361|Q6A361_VIPAP	Ammodytoxin C variant OS=Vipera aspis aspis OX=194601 PE=2 SV=1	15468	21	16	320.6	36
P00626|PA2BA_VIPAA	Basic phospholipase A2 ammodytoxin A OS=Vipera ammodytes ammodytes OX=8705 PE=1 SV=2	15531	21	16	320.6	36
P14424|PA2BB_VIPAA	Basic phospholipase A2 ammodytoxin B OS=Vipera ammodytes ammodytes OX=8705 PE=1 SV=2	15529	21	16	320.6	36
tr|Q6A362|Q6A362_VIPAP	Ammodytoxin B isoform OS=Vipera aspis aspis OX=194601 PE=2 SV=1	15529	21	16	320.6	36
tr|Q6A360|Q6A360_VIPAP	Ammodytoxin B isoform OS=Vipera aspis aspis OX=194601 PE=2 SV=1	15559	21	16	320.6	36
A0A6B7FMR5|VMMP3_VIPAA	Disintegrin-like/cysteine-rich protein MPIII-3 OS=Vipera ammodytes ammodytes OX=8705 PE=1 SV=1	36837	24	12	248.03	21
tr|A0A1I9KNT0|A0A1I9KNT0_VIPAA	Metalloproteinase of class P-II MPII-1 OS=Vipera ammodytes ammodytes OX=8705 PE=2 SV=1	53479	17	4	233.03	22
tr|A0A6B7FRF2|A0A6B7FRF2_VIPAA	Amine oxidase OS=Vipera ammodytes ammodytes OX=8705 PE=2 SV=1	57103	28	6	228.61	26
tr|A0A6B7FNN4|A0A6B7FNN4_VIPAA	Metalloproteinase of class P-III MPIII-5 OS=Vipera ammodytes ammodytes OX=8705 PE=2 SV=1	68346	24	6	219.66	29
R4NNL0|VMH3_VIPAA	Zinc metalloproteinase-disintegrin-like protein H3 OS=Vipera ammodytes ammodytes OX=8705 PE=1 SV=1	68546	24	6	219.66	29
P82475|TXVE2_MACLB	Snake venom vascular endothelial growth factor toxin ICPP OS=Macrovipera lebetina OX=8709 PE=1 SV=2	12574	13	13	218.78	47
P0DW97|TXVE_DABPA	Snake venom vascular endothelial growth factor toxin OS=Daboia palaestinae OX=1170828 PE=1 SV=1	12590	13	13	218.78	47
tr|Q6A3L1|Q6A3L1_VIPAP	Ammodytin I1(E) isoform OS=Vipera aspis aspis OX=194601 PE=2 SV=1	15428	16	2	212.96	41
Q4VM08|VM3VA_MACLB	Zinc metalloproteinase-disintegrin-like VLAIP-A OS=Macrovipera lebetina OX=8709 PE=1 SV=1	68710	19	3	203.29	23
tr|A0A1I9KNR7|A0A1I9KNR7_VIPAA	Disintegrin Dis-1 OS=Vipera ammodytes ammodytes OX=8705 PE=2 SV=1	13997	17	17	198.71	59
tr|A0A1I9KNR4|A0A1I9KNR4_VIPAA	Disintegrin Dis-1 OS=Vipera ammodytes ammodytes OX=8705 PE=2 SV=1	13983	17	17	198.71	59
tr|A0A6B7FMR4|A0A6B7FMR4_VIPAA	Metalloproteinase of class P-III MPIII-4 OS=Vipera ammodytes ammodytes OX=8705 PE=2 SV=1	68844	9	3	185.16	10
tr|A0A1J0CZN1|A0A1J0CZN1_VIPAA	SVMPi-1 OS=Vipera ammodytes ammodytes OX=8705 PE=2 SV=1	20075	10	6	182.32	14
tr|A0A6B7FPT0|A0A6B7FPT0_VIPAA	Endogenous tripeptide metalloproteinase inhibitor MPi-5 OS=Vipera ammodytes ammodytes OX=8705 PE=2 SV=1	15039	10	6	182.32	18
Q9YGJ7|PA2A8_DABPA	Acidic phospholipase A2 VP8 OS=Daboia palaestinae OX=1170828 PE=3 SV=1	15350	14	2	181.06	50
W8EFS0|V5NTD_MACLB	Snake venom 5'-nucleotidase (Fragment) OS=Macrovipera lebetina OX=8709 PE=1 SV=1	45031	11	3	172.19	25
tr|A0A6B7FQF8|A0A6B7FQF8_VIPAA	Serine proteinase SP-6 OS=Vipera ammodytes ammodytes OX=8705 PE=2 SV=1	28317	11	6	168.27	26
tr|A0A1I9KNP1|A0A1I9KNP1_VIPAA	C-type lectin snaclec-4 OS=Vipera ammodytes ammodytes OX=8705 PE=2 SV=1	17505	10	4	166.33	39
tr|A0A1I9KNN1|A0A1I9KNN1_VIPAA	C-type lectin snaclec-3 OS=Vipera ammodytes ammodytes OX=8705 PE=2 SV=1	17398	9	3	157.99	26
tr|A0A1I9KNR8|A0A1I9KNR8_VIPAA	Serine proteinase SP-4 OS=Vipera ammodytes ammodytes OX=8705 PE=2 SV=1	28587	12	2	157.5	24
tr|A0A1I9KNR6|A0A1I9KNR6_VIPAA	Metalloproteinase of class P-III MPIII-1 OS=Vipera ammodytes ammodytes OX=8705 PE=2 SV=1	68388	7	5	157.29	8
tr|K9JBU0|K9JBU0_DABRR	Dabocetin alpha subunit OS=Daboia russelii russelii OX=31159 PE=2 SV=1	17493	8	2	154.53	34
tr|A0A1J0CZM7|A0A1J0CZM7_VIPAA	Snaclec-7 OS=Vipera ammodytes ammodytes OX=8705 PE=2 SV=1	17285	7	2	150.98	32
tr|E9JG34|E9JG34_ECHCS	Metalloproteinase OS=Echis carinatus sochureki OX=124223 PE=2 SV=1	69245	13	2	150.22	11
tr|A0A6G5ZVU9|A0A6G5ZVU9_VIPAN	Nerve growth factor 1 OS=Vipera anatolica senliki OX=2604287 PE=2 SV=1	27325	6	6	146.56	22
tr|A0A6B7FPT6|A0A6B7FPT6_VIPAA	Vascular nerve growth factor OS=Vipera ammodytes ammodytes OX=8705 PE=2 SV=1	26649	6	6	146.56	22
B4XSY5|SLAA_MACLB	Snaclec A10 OS=Macrovipera lebetina OX=8709 PE=2 SV=1	17731	5	2	143.68	27
B4XSY6|SLAB_MACLB	Snaclec A11 OS=Macrovipera lebetina OX=8709 PE=2 SV=1	17738	5	2	143.68	27
Q9PT40|VSPH2_MACLB	Snake venom serine protease homolog 2 OS=Macrovipera lebetina OX=8709 PE=2 SV=1	28894	9	2	143.28	27
tr|A0A6B7FMQ9|A0A6B7FMQ9_VIPAA	Phospholipase B-like OS=Vipera ammodytes ammodytes OX=8705 PE=2 SV=1	64310	6	6	138.09	7
P0DJL4|SLA_DABPA	Snaclec VP12 subunit A (Fragment) OS=Daboia palaestinae OX=1170828 PE=1 SV=1	12125	5	5	136.18	30
E0Y418|VSP1_MACLB	Serine protease VLSP-1 OS=Macrovipera lebetina OX=8709 PE=2 SV=1	28702	7	5	136.13	19
tr|F2Q6G0|F2Q6G0_DEIAC	Cysteine-rich seceretory protein Da-CRPa (Fragment) OS=Deinagkistrodon acutus OX=36307 PE=2 SV=1	24743	6	2	134.48	22
tr|F2Q6F1|F2Q6F1_CROVI	Cysteine-rich seceretory protein Cv-CRP (Fragment) OS=Crotalus viridis OX=8739 PE=2 SV=1	24861	6	2	134.48	22
tr|F2Q6G1|F2Q6G1_DEIAC	Cysteine-rich seceretory protein Da-CRPb (Fragment) OS=Deinagkistrodon acutus OX=36307 PE=2 SV=1	24748	6	2	134.48	22
tr|A0A0B8RNS9|A0A0B8RNS9_BOIIR	Xaa-Pro aminopeptidase 2 OS=Boiga irregularis OX=92519 PE=3 SV=1	76736	4	4	132.01	5
tr|A0A1L8D689|A0A1L8D689_BOTAT	Snake venom metalloproteinase OS=Bothrops atrox OX=8725 PE=2 SV=1	67598	4	2	130.23	5
tr|K9JBU4|K9JBU4_DABSI	p68 beta subunit OS=Daboia siamensis OX=343250 PE=2 SV=1	16910	6	4	129.87	34
tr|K9JCR4|K9JCR4_DABRR	p68 beta subunit OS=Daboia russelii limitis OX=338883 PE=2 SV=1	16910	6	4	129.87	34
P0DJL5|SLB_DABPA	Snaclec VP12 subunit B OS=Daboia palaestinae OX=1170828 PE=1 SV=1	15157	7	2	129.74	34
P83253|DID1A_MACLB	Disintegrin lebein-1-alpha OS=Macrovipera lebetina OX=8709 PE=1 SV=2	12099	3	2	129.25	40
tr|A0A1I9KNL5|A0A1I9KNL5_VIPAA	Serine proteinase SP-2 OS=Vipera ammodytes ammodytes OX=8705 PE=2 SV=1	28885	11	5	127.73	20
Q71QH5|VSP08_TRIST	Snake venom serine protease KN8 OS=Trimeresurus stejnegeri OX=39682 PE=2 SV=1	28176	6	5	125.4	9
Q98995|VM2L2_MACLB	Zinc metalloproteinase/disintegrin OS=Macrovipera lebetina OX=8709 PE=1 SV=1	53480	6	2	124.88	6
B4XT06|SLB7_MACLB	Snaclec B7 (Fragment) OS=Macrovipera lebetina OX=8709 PE=2 SV=1	15036	7	6	121.55	18
Q7LZ09|LEB_MACLB	Lebetin-2-alpha OS=Macrovipera lebetina OX=8709 PE=1 SV=1	3945	4	4	117.03	37
P00992|VKT3_VIPAA	Kunitz-type serine protease inhibitor 3 OS=Vipera ammodytes ammodytes OX=8705 PE=1 SV=2	10330	6	5	116.96	32
E5AJX3|VKT_VIPBN	Kunitz-type serine protease inhibitor ki-VN OS=Vipera berus nikolskii OX=1808362 PE=2 SV=1	10426	6	5	116.96	32
tr|K9JDF6|K9JDF6_DABSI	p31 beta subunit OS=Daboia siamensis OX=343250 PE=2 SV=1	17338	3	3	112.23	17
tr|K9JBV3|K9JBV3_DABRR	p31 beta subunit OS=Daboia russelii limitis OX=338883 PE=2 SV=1	17252	3	3	112.23	17
tr|K9JDK6|K9JDK6_DABRR	p31 beta subunit OS=Daboia russelii russelii OX=31159 PE=2 SV=1	17378	3	3	112.23	17
tr|E9JG53|E9JG53_ECHCS	Metalloproteinase (Fragment) OS=Echis carinatus sochureki OX=124223 PE=2 SV=1	27821	2	2	89.98	6
tr|E9JG44|E9JG44_ECHCS	Metalloproteinase (Fragment) OS=Echis carinatus sochureki OX=124223 PE=2 SV=1	29963	2	2	89.98	6
P82972|VNP_PSEPC	Natriuretic peptide PNP OS=Pseudocerastes persicus OX=47769 PE=1 SV=1	3944	3	3	89.77	73
C0HKZ6|SLMA_MACLB	Snaclec macrovipecetin subunit alpha OS=Macrovipera lebetina OX=8709 PE=1 SV=1	15418	3	2	86.44	32
tr|T2HS00|T2HS00_PROFL	Prosaposin OS=Protobothrops flavoviridis OX=88087 PE=2 SV=1	58564	2	2	82.13	4
tr|A0A8T1N163|A0A8T1N163_BOTJA	Snake venom serine protease OS=Bothrops jararaca OX=8724 GN=JKG30_000013 PE=3 SV=1	28659	3	2	75.14	8
Q7ZT98|CRVP_OPHHA	Cysteine-rich venom protein ophanin OS=Ophiophagus hannah OX=8665 PE=1 SV=1	26869	2	2	74.51	5
tr|V8N8B4|V8N8B4_OPHHA	ShKT domain-containing protein OS=Ophiophagus hannah OX=8665 GN=L345_16118 PE=3 SV=1	24779	2	2	74.51	5
tr|C1JZW4|C1JZW4_OPHHA	Opharin OS=Ophiophagus hannah OX=8665 PE=2 SV=1	26305	2	2	74.51	5
Q8AVA3|CRVP_PSEPO	Cysteine-rich venom protein pseudecin OS=Pseudechis porphyriacus OX=8671 PE=1 SV=1	26452	2	2	74.51	5
Q8AVA4|CRVP_PSEAU	Cysteine-rich venom protein pseudechetoxin OS=Pseudechis australis OX=8670 PE=1 SV=1	26475	2	2	74.51	5
tr|A0A1D8BAX5|A0A1D8BAX5_PSEPP	Cysteine-rich secretory protein OS=Pseudechis papuanus OX=61265 GN=CRiSP1 PE=2 SV=1	26459	2	2	74.51	5
A6MFK9|CRVP_DEMVE	Cysteine-rich venom protein OS=Demansia vestigiata OX=412038 PE=2 SV=1	26470	2	2	74.51	5
tr|A0A098LWY0|A0A098LWY0_9SAUR	Cysteine-rich secretory protein A OS=Opheodrys aestivus OX=186591 PE=2 SV=1	26749	2	2	74.51	5
tr|A0A346CM44|A0A346CM44_9SAUR	Metalloproteinase 17 (Fragment) OS=Ahaetulla prasina OX=499056 PE=2 SV=1	68144	2	2	73.29	3
tr|A0A346CM36|A0A346CM36_9SAUR	Metalloproteinase 31 (Fragment) OS=Ahaetulla prasina OX=499056 PE=2 SV=1	68120	2	2	73.29	3
tr|A0A346CM27|A0A346CM27_9SAUR	Metalloproteinase 35 (Fragment) OS=Ahaetulla prasina OX=499056 PE=2 SV=1	68041	2	2	73.29	3
tr|A0A346CM41|A0A346CM41_9SAUR	Metalloproteinase 37 (Fragment) OS=Ahaetulla prasina OX=499056 PE=2 SV=1	68148	2	2	73.29	3
tr|A0A346CM32|A0A346CM32_9SAUR	Metalloproteinase 22 (Fragment) OS=Ahaetulla prasina OX=499056 PE=2 SV=1	68152	2	2	73.29	3
tr|A0A1J0CZM4|A0A1J0CZM4_VIPAA	Snaclec-5 OS=Vipera ammodytes ammodytes OX=8705 PE=2 SV=1	18101	2	2	71.92	12
tr|A0A1J0CZM8|A0A1J0CZM8_VIPAA	Snaclec-6 OS=Vipera ammodytes ammodytes OX=8705 PE=2 SV=1	18052	2	2	71.92	12
tr|A0A2D4G9B5|A0A2D4G9B5_MICCO	C-type lectin domain-containing protein (Fragment) OS=Micrurus corallinus OX=54390 PE=3 SV=1	11772	2	2	68.26	10
A3QVN6|HYAL_ECHPL	Hyaluronidase OS=Echis pyramidum leakeyi OX=38415 PE=2 SV=1	52688	2	2	66.5	5
A3QVN3|HYAL1_CERCE	Hyaluronidase-1 OS=Cerastes cerastes OX=8697 PE=2 SV=1	52654	2	2	66.5	5
A3QVN5|HYAL4_CERCE	Hyaluronidase-4 OS=Cerastes cerastes OX=8697 PE=2 SV=1	52622	2	2	66.5	5
A3QVN4|HYAL3_CERCE	Hyaluronidase-3 OS=Cerastes cerastes OX=8697 PE=2 SV=1	52616	2	2	66.5	5
tr|A8HR02|A8HR02_DEIAC	Thrombin-like protein (Fragment) OS=Deinagkistrodon acutus OX=36307 PE=2 SV=1	26007	2	2	65.32	4
tr|B3V4Z6|B3V4Z6_DEIAC	Thrombin-like protein DAV-WY OS=Deinagkistrodon acutus OX=36307 PE=2 SV=1	28705	2	2	65.32	4
W8E7D1|PDE_MACLB	Venom phosphodiesterase OS=Macrovipera lebetina OX=8709 PE=1 SV=1	96181	2	2	58.4	3
P0DMT1|PA2HS_ECHPL	Phospholipase A2 homolog EPL_00195 OS=Echis pyramidum leakeyi OX=38415 PE=1 SV=1	13712	2	2	52.82	15
P0DMT3|PA2HS_ECHCO	Phospholipase A2 homolog ECO_00035 OS=Echis coloratus OX=64175 PE=1 SV=1	13706	2	2	52.82	15
tr|A0A140YIG3|A0A140YIG3_ECHCA	Basic phospholipase A2 OS=Echis carinatus OX=40353 PE=2 SV=1	15601	2	2	52.82	13
tr|A0A0A1WC82|A0A0A1WC82_ECHCO	Phospholipase A2 Group IIA c OS=Echis coloratus OX=64175 PE=2 SV=1	15595	2	2	52.82	13
tr|A0A0A1WDL6|A0A0A1WDL6_ECHCO	Phospholipase A2 Group IIA b (Fragment) OS=Echis coloratus OX=64175 PE=2 SV=1	16636	2	2	52.82	12
tr|A0A0A1WDQ3|A0A0A1WDQ3_ECHCO	Phospholipase A2 Group IIA a (Fragment) OS=Echis coloratus OX=64175 PE=2 SV=1	16954	2	2	52.82	12

## Sheet: M. albizona_MELD
Protein ID	Protein description	Average Mass	# of matched peptides	# of unique peptides	Protein score	Proteoin coverage
tr|Q6A363|Q6A363_VIPAP	Ammodytoxin C variant OS=Vipera aspis aspis OX=194601 PE=2 SV=1	15353	26	67	269.04	55
tr|Q6A361|Q6A361_VIPAP	Ammodytoxin C variant OS=Vipera aspis aspis OX=194601 PE=2 SV=1	15468	26	67	269.04	55
tr|Q6A362|Q6A362_VIPAP	Ammodytoxin B isoform OS=Vipera aspis aspis OX=194601 PE=2 SV=1	15529	26	67	269.04	55
P14424|PA2BB_VIPAA	Basic phospholipase A2 ammodytoxin B OS=Vipera ammodytes ammodytes OX=8705 PE=1 SV=2	15529	26	67	269.04	55
P00626|PA2BA_VIPAA	Basic phospholipase A2 ammodytoxin A OS=Vipera ammodytes ammodytes OX=8705 PE=1 SV=2	15531	26	67	269.04	55
tr|Q6A360|Q6A360_VIPAP	Ammodytoxin B isoform OS=Vipera aspis aspis OX=194601 PE=2 SV=1	15559	26	67	269.04	55
P11407|PA2BC_VIPAA	Basic phospholipase A2 ammodytoxin C OS=Vipera ammodytes ammodytes OX=8705 PE=1 SV=1	15498	26	67	269.04	55
P31854|PA2B_VIPBB	Basic phospholipase A2 Pla2Vb OS=Vipera berus berus OX=31156 PE=1 SV=2	15716	7	94	217.53	64
A0A6B7FMR5|VMMP3_VIPAA	Disintegrin-like/cysteine-rich protein MPIII-3 OS=Vipera ammodytes ammodytes OX=8705 PE=1 SV=1	36837	25	79	207.54	36
tr|A0A6B7FNN4|A0A6B7FNN4_VIPAA	Metalloproteinase of class P-III MPIII-5 OS=Vipera ammodytes ammodytes OX=8705 PE=2 SV=1	68346	4	39	200.54	38
R4NNL0|VMH3_VIPAA	Zinc metalloproteinase-disintegrin-like protein H3 OS=Vipera ammodytes ammodytes OX=8705 PE=1 SV=1	68546	4	39	200.54	38
Q4VM08|VM3VA_MACLB	Zinc metalloproteinase-disintegrin-like VLAIP-A OS=Macrovipera lebetina OX=8709 PE=1 SV=1	68710	3	36	197.33	31
tr|A0A1I9KNT0|A0A1I9KNT0_VIPAA	Metalloproteinase of class P-II MPII-1 OS=Vipera ammodytes ammodytes OX=8705 PE=2 SV=1	53479	6	36	193.08	34
tr|A0A6B7FRF2|A0A6B7FRF2_VIPAA	Amine oxidase OS=Vipera ammodytes ammodytes OX=8705 PE=2 SV=1	57103	6	52	192.68	39
tr|A0A1J0CZN1|A0A1J0CZN1_VIPAA	SVMPi-1 OS=Vipera ammodytes ammodytes OX=8705 PE=2 SV=1	20075	9	41	178.62	16
tr|A0A6B7FPT0|A0A6B7FPT0_VIPAA	Endogenous tripeptide metalloproteinase inhibitor MPi-5 OS=Vipera ammodytes ammodytes OX=8705 PE=2 SV=1	15039	9	41	178.62	20
B4XSY5|SLAA_MACLB	Snaclec A10 OS=Macrovipera lebetina OX=8709 PE=2 SV=1	17731	8	39	177.04	43
tr|Q6A3D9|Q6A3D9_VIPAP	Ammodytin I2(A'') isoform OS=Vipera aspis aspis OX=194601 PE=2 SV=1	15281	7	61	176.58	63
tr|Q6A3B1|Q6A3B1_VIPAA	Ammodytin I2(A') isoform OS=Vipera ammodytes ammodytes OX=8705 PE=2 SV=1	15322	7	61	176.58	63
tr|Q6YCN7|Q6YCN7_VIPBB	Ammodytin I2 OS=Vipera berus berus OX=31156 GN=AmtI2 PE=2 SV=1	15309	7	61	176.58	63
tr|Q6A3F2|Q6A3F2_VIPAZ	Ammodytin I2(A) isoform OS=Vipera aspis zinnikeri OX=55427 PE=2 SV=1	15309	7	61	176.58	63
tr|Q6A3F4|Q6A3F4_VIPAP	Ammodytin I2(A) variant OS=Vipera aspis aspis OX=194601 PE=2 SV=1	15279	7	61	176.58	63
tr|Q6YCN8|Q6YCN8_VIPAS	Ammodytin I2 OS=Vipera aspis OX=8706 GN=AmtI2 PE=3 SV=1	15309	7	61	176.58	63
tr|Q6YCN9|Q6YCN9_VIPAP	Ammodytin I2 OS=Vipera aspis aspis OX=194601 GN=AmtI2 PE=2 SV=1	15309	7	61	176.58	63
tr|Q6A3D1|Q6A3D1_VIPAP	Ammodytin I2(A) variant OS=Vipera aspis aspis OX=194601 PE=2 SV=1	15323	7	61	176.58	63
P34180|PA2N2_VIPAA	Neutral phospholipase A2 ammodytin I2 OS=Vipera ammodytes ammodytes OX=8705 PE=1 SV=2	15309	7	61	176.58	63
tr|Q6A3C9|Q6A3C9_VIPAP	Ammodytin I2(A) variant OS=Vipera aspis aspis OX=194601 PE=2 SV=1	15324	7	61	176.58	63
tr|Q6A3C7|Q6A3C7_VIPAM	Ammodytin I2(A) isoform OS=Vipera ammodytes ruffoi OX=246549 PE=2 SV=1	15309	7	61	176.58	63
tr|Q6A3A9|Q6A3A9_VIPAA	Ammodytin I2(A) isoform OS=Vipera ammodytes ammodytes OX=8705 PE=2 SV=1	15309	7	61	176.58	63
tr|Q6A3E3|Q6A3E3_VIPAP	Ammodytin I2(A''') isoform OS=Vipera aspis aspis OX=194601 PE=2 SV=1	15293	7	61	176.58	63
A8CG87|PA2A2_DABRR	Acidic phospholipase A2 Drk-a2 OS=Daboia russelii OX=8707 PE=2 SV=1	15586	5	57	170.56	46
A8CG78|PA2A2_DABSI	Acidic phospholipase A2 DsM-a2/DsM-a2' OS=Daboia siamensis OX=343250 PE=1 SV=1	15586	5	57	170.56	46
tr|A0A6B7FMR4|A0A6B7FMR4_VIPAA	Metalloproteinase of class P-III MPIII-4 OS=Vipera ammodytes ammodytes OX=8705 PE=2 SV=1	68844	5	35	170.23	22
E0Y418|VSP1_MACLB	Serine protease VLSP-1 OS=Macrovipera lebetina OX=8709 PE=2 SV=1	28702	18	49	167.26	49
P82475|TXVE2_MACLB	Snake venom vascular endothelial growth factor toxin ICPP OS=Macrovipera lebetina OX=8709 PE=1 SV=2	12574	15	23	165.44	54
P0DW97|TXVE_DABPA	Snake venom vascular endothelial growth factor toxin OS=Daboia palaestinae OX=1170828 PE=1 SV=1	12590	15	23	165.44	54
W8EFS0|V5NTD_MACLB	Snake venom 5'-nucleotidase (Fragment) OS=Macrovipera lebetina OX=8709 PE=1 SV=1	45031	4	26	163.22	43
tr|K9JBU4|K9JBU4_DABSI	p68 beta subunit OS=Daboia siamensis OX=343250 PE=2 SV=1	16910	6	27	159.77	53
tr|K9JCR4|K9JCR4_DABRR	p68 beta subunit OS=Daboia russelii limitis OX=338883 PE=2 SV=1	16910	6	27	159.77	53
tr|A0A6B7FQF8|A0A6B7FQF8_VIPAA	Serine proteinase SP-6 OS=Vipera ammodytes ammodytes OX=8705 PE=2 SV=1	28317	6	42	157.47	53
C0HKZ6|SLMA_MACLB	Snaclec macrovipecetin subunit alpha OS=Macrovipera lebetina OX=8709 PE=1 SV=1	15418	9	25	155.91	70
B4XSY8|SLAD_MACLB	Snaclec A13 OS=Macrovipera lebetina OX=8709 PE=2 SV=1	15308	4	27	155.23	66
B4XSY7|SLAC_MACLB	Snaclec A12 OS=Macrovipera lebetina OX=8709 PE=2 SV=1	17717	4	27	155.23	56
tr|A0A6G5ZVX7|A0A6G5ZVX7_VIPAN	Serine protease 7 OS=Vipera anatolica senliki OX=2604287 PE=2 SV=1	28928	2	33	153.76	42
tr|A0A6G5ZUR6|A0A6G5ZUR6_VIPAN	Serine protease 6 OS=Vipera anatolica senliki OX=2604287 PE=2 SV=1	28914	2	33	153.76	42
A0A1I9KNP0|VSPH1_VIPAA	Vaa serine proteinase homolog 1 OS=Vipera ammodytes ammodytes OX=8705 PE=1 SV=1	28928	2	33	153.76	42
tr|A0A6B7FMQ9|A0A6B7FMQ9_VIPAA	Phospholipase B-like OS=Vipera ammodytes ammodytes OX=8705 PE=2 SV=1	64310	9	22	153.11	28
tr|A0A1I9KNN1|A0A1I9KNN1_VIPAA	C-type lectin snaclec-3 OS=Vipera ammodytes ammodytes OX=8705 PE=2 SV=1	17398	3	23	152.21	50
tr|A0A1J0CZM7|A0A1J0CZM7_VIPAA	Snaclec-7 OS=Vipera ammodytes ammodytes OX=8705 PE=2 SV=1	17285	5	26	150.39	64
tr|A0A0B8RNS9|A0A0B8RNS9_BOIIR	Xaa-Pro aminopeptidase 2 OS=Boiga irregularis OX=92519 PE=3 SV=1	76736	18	20	149.12	21
P0DJL4|SLA_DABPA	Snaclec VP12 subunit A (Fragment) OS=Daboia palaestinae OX=1170828 PE=1 SV=1	12125	10	23	148.5	75
tr|A0A1I9KNS3|A0A1I9KNS3_VIPAA	Metalloproteinase of class P-II MPII-3 OS=Vipera ammodytes ammodytes OX=8705 PE=2 SV=1	53069	2	17	147.61	22
Q9PT40|VSPH2_MACLB	Snake venom serine protease homolog 2 OS=Macrovipera lebetina OX=8709 PE=2 SV=1	28894	2	30	147.15	40
tr|Q6A351|Q6A351_VIPAZ	Vaspin basic subunit variant OS=Vipera aspis zinnikeri OX=55427 PE=2 SV=1	15638	2	18	146.05	19
B4XT06|SLB7_MACLB	Snaclec B7 (Fragment) OS=Macrovipera lebetina OX=8709 PE=2 SV=1	15036	5	20	144.12	44
tr|A0A194APV2|A0A194APV2_9SAUR	L-amino-acid oxidase OS=Agkistrodon piscivorus OX=8715 PE=3 SV=1	58647	3	22	142.62	18
tr|K9JBU0|K9JBU0_DABRR	Dabocetin alpha subunit OS=Daboia russelii russelii OX=31159 PE=2 SV=1	17493	2	18	142.53	45
P0DJL5|SLB_DABPA	Snaclec VP12 subunit B OS=Daboia palaestinae OX=1170828 PE=1 SV=1	15157	4	28	142.39	74
tr|A0A1I9KNL5|A0A1I9KNL5_VIPAA	Serine proteinase SP-2 OS=Vipera ammodytes ammodytes OX=8705 PE=2 SV=1	28885	12	31	141.31	40
tr|K9JDF2|K9JDF2_DABRR	p68 alpha subunit OS=Daboia russelii limitis OX=338883 PE=2 SV=1	18108	2	25	139.31	46
tr|K9JBV0|K9JBV0_DABSI	p68 alpha subunit OS=Daboia siamensis OX=343250 PE=2 SV=1	17996	2	25	139.31	46
tr|A0A1I9KNP1|A0A1I9KNP1_VIPAA	C-type lectin snaclec-4 OS=Vipera ammodytes ammodytes OX=8705 PE=2 SV=1	17505	2	26	138.42	53
tr|A0A1I9KNR7|A0A1I9KNR7_VIPAA	Disintegrin Dis-1 OS=Vipera ammodytes ammodytes OX=8705 PE=2 SV=1	13997	12	32	136	48
tr|A0A1I9KNR4|A0A1I9KNR4_VIPAA	Disintegrin Dis-1 OS=Vipera ammodytes ammodytes OX=8705 PE=2 SV=1	13983	12	32	136	48
tr|A0A1J0CZM4|A0A1J0CZM4_VIPAA	Snaclec-5 OS=Vipera ammodytes ammodytes OX=8705 PE=2 SV=1	18101	6	14	133.16	44
tr|A0A1J0CZM8|A0A1J0CZM8_VIPAA	Snaclec-6 OS=Vipera ammodytes ammodytes OX=8705 PE=2 SV=1	18052	6	14	133.16	44
E0Y421|VSPY_MACLB	Chymotrypsin-like protease VLCTLP OS=Macrovipera lebetina OX=8709 PE=1 SV=1	28278	3	16	133.11	46
tr|F8S109|F8S109_CROAD	Metalloproteinase 8 (Fragment) OS=Crotalus adamanteus OX=8729 PE=2 SV=1	54615	2	23	127.49	14
tr|A0A1W7RB90|A0A1W7RB90_CROAD	Cadam10_SVMPIII-2 OS=Crotalus adamanteus OX=8729 PE=4 SV=1	68421	2	23	127.49	11
tr|J3S831|J3S831_CROAD	Snake venom metalloproteinase (Type III) 5 OS=Crotalus adamanteus OX=8729 PE=2 SV=1	68434	2	23	127.49	11
tr|A0A6B7FMP6|A0A6B7FMP6_VIPAA	C-type lectin-like Snaclec-9 OS=Vipera ammodytes ammodytes OX=8705 PE=2 SV=1	18081	3	14	127.17	42
tr|A0A1I9KNR6|A0A1I9KNR6_VIPAA	Metalloproteinase of class P-III MPIII-1 OS=Vipera ammodytes ammodytes OX=8705 PE=2 SV=1	68388	3	15	125.5	12
tr|A0A1I9KNR8|A0A1I9KNR8_VIPAA	Serine proteinase SP-4 OS=Vipera ammodytes ammodytes OX=8705 PE=2 SV=1	28587	3	23	125.38	34
P31100|PA2A7_DABSI	Acidic phospholipase A2 RV-7 OS=Daboia siamensis OX=343250 PE=1 SV=1	15421	3	11	124.57	18
tr|B3RFI6|B3RFI6_DABRR	phospholipase A2 OS=Daboia russelii limitis OX=338883 PE=2 SV=1	15421	3	11	124.57	18
tr|B2YHV5|B2YHV5_DABSI	phospholipase A2 OS=Daboia siamensis OX=343250 GN=PLA2S3 PE=3 SV=1	15479	3	11	124.57	18
tr|A0A6G5ZVU9|A0A6G5ZVU9_VIPAN	Nerve growth factor 1 OS=Vipera anatolica senliki OX=2604287 PE=2 SV=1	27325	8	9	121.78	18
P25428|NGFV_MACLB	Venom nerve growth factor OS=Macrovipera lebetina OX=8709 PE=1 SV=2	27318	8	9	121.78	18
tr|A0A098LWS4|A0A098LWS4_PYTRG	Amine oxidase OS=Python regius OX=51751 PE=2 SV=1	57250	2	11	121.03	8
B4XSZ3|SLA3_MACLB	Snaclec A3 (Fragment) OS=Macrovipera lebetina OX=8709 PE=2 SV=1	17937	2	11	117.87	39
Q98995|VM2L2_MACLB	Zinc metalloproteinase/disintegrin OS=Macrovipera lebetina OX=8709 PE=1 SV=1	53480	4	10	104.98	9
Q71QH5|VSP08_TRIST	Snake venom serine protease KN8 OS=Trimeresurus stejnegeri OX=39682 PE=2 SV=1	28176	7	10	102.49	6
E5AJX3|VKT_VIPBN	Kunitz-type serine protease inhibitor ki-VN OS=Vipera berus nikolskii OX=1808362 PE=2 SV=1	10426	3	3	98.07	17
tr|E9JG44|E9JG44_ECHCS	Metalloproteinase (Fragment) OS=Echis carinatus sochureki OX=124223 PE=2 SV=1	29963	4	8	96.04	7
tr|E9JG53|E9JG53_ECHCS	Metalloproteinase (Fragment) OS=Echis carinatus sochureki OX=124223 PE=2 SV=1	27821	4	8	96.04	7
V5TBK6|VMH4A_VIPAA	Zinc metalloproteinase-disintegrin-like protein H4 subunit A OS=Vipera ammodytes ammodytes OX=8705 PE=1 SV=1	68662	2	7	93.44	6
tr|A0A6B7FRK6|A0A6B7FRK6_VIPAA	Metalloproteinase of class P-III MPIII-2 OS=Vipera ammodytes ammodytes OX=8705 PE=2 SV=1	69218	2	9	92.24	7
tr|A0A8T1N163|A0A8T1N163_BOTJA	Snake venom serine protease OS=Bothrops jararaca OX=8724 GN=JKG30_000013 PE=3 SV=1	28659	2	6	89.79	12
Q27J47|VSPPA_LACMU	Venom plasminogen activator LV-PA OS=Lachesis muta muta OX=8753 PE=1 SV=1	28062	3	9	87.72	23
B4XT01|SLB2_MACLB	Snaclec B2 OS=Macrovipera lebetina OX=8709 PE=2 SV=1	16581	2	4	86.14	20
B4XT02|SLB3_MACLB	Snaclec B3/B5 OS=Macrovipera lebetina OX=8709 PE=2 SV=1	16675	2	4	86.14	20
B4XT03|SLB4_MACLB	Snaclec B4 OS=Macrovipera lebetina OX=8709 PE=2 SV=1	16641	2	4	86.14	20
B4XT00|SLB1_MACLB	Snaclec B1 OS=Macrovipera lebetina OX=8709 PE=2 SV=1	16642	2	4	86.14	20
Q6T7B5|SL3_BITGA	Snaclec 3 OS=Bitis gabonica OX=8694 PE=2 SV=1	18095	2	5	78.4	10
tr|A0A194ARU4|A0A194ARU4_9SAUR	C-type lectin 5b OS=Agkistrodon piscivorus OX=8715 PE=4 SV=1	18334	2	3	76.56	9
tr|A0A194APX0|A0A194APX0_9SAUR	C-type lectin 5a OS=Agkistrodon piscivorus OX=8715 PE=4 SV=1	18349	2	3	76.56	9
tr|A0A194APN7|A0A194APN7_9SAUR	C-type lectin 5c OS=Agkistrodon piscivorus OX=8715 PE=4 SV=1	18363	2	3	76.56	9
C0K3N5|VEGFA_VIPAA	Vascular endothelial growth factor A OS=Vipera ammodytes ammodytes OX=8705 PE=2 SV=1	22460	2	2	75.55	6
tr|A0A0A1WCF9|A0A0A1WCF9_ECHCO	Vascular endothelial growth factor A OS=Echis coloratus OX=64175 PE=2 SV=1	22515	2	2	75.55	6
tr|A0A182C5X2|A0A182C5X2_9SAUR	Vascular Endothelial Growth Factor OS=Phalotris mertensi OX=1260334 PE=3 SV=1	22605	2	2	75.55	6
tr|J3S9B2|J3S9B2_CROAD	Prosaposin OS=Crotalus adamanteus OX=8729 PE=2 SV=1	58013	3	3	61.84	5
tr|T2HS00|T2HS00_PROFL	Prosaposin OS=Protobothrops flavoviridis OX=88087 PE=2 SV=1	58564	3	3	61.84	5
tr|A8HR02|A8HR02_DEIAC	Thrombin-like protein (Fragment) OS=Deinagkistrodon acutus OX=36307 PE=2 SV=1	26007	2	2	53.48	4
tr|B3V4Z6|B3V4Z6_DEIAC	Thrombin-like protein DAV-WY OS=Deinagkistrodon acutus OX=36307 PE=2 SV=1	28705	2	2	53.48	4

## Sheet: M. raddei_Trypsin
Protein ID	Protein description	Average Mass	# of matched peptides	# of unique peptides	Protein score (-10LgP)	Proteoin coverage
tr|A0A6B7FRF2|A0A6B7FRF2_VIPAA	Amine oxidase OS=Vipera ammodytes ammodytes OX=8705 PE=2 SV=1	57103	32	7	211.8	30
A0A6B7FMR5|VMMP3_VIPAA	Disintegrin-like/cysteine-rich protein MPIII-3 OS=Vipera ammodytes ammodytes OX=8705 PE=1 SV=1	36837	18	8	208.47	20
tr|A0A6B7FNN4|A0A6B7FNN4_VIPAA	Metalloproteinase of class P-III MPIII-5 OS=Vipera ammodytes ammodytes OX=8705 PE=2 SV=1	68346	19	3	189.88	24
tr|A0A1I9KNT0|A0A1I9KNT0_VIPAA	Metalloproteinase of class P-II MPII-1 OS=Vipera ammodytes ammodytes OX=8705 PE=2 SV=1	53479	10	4	186.95	14
A8CG87|PA2A2_DABRR	Acidic phospholipase A2 Drk-a2 OS=Daboia russelii OX=8707 PE=2 SV=1	15586	11	2	180.94	25
A8CG78|PA2A2_DABSI	Acidic phospholipase A2 DsM-a2/DsM-a2' OS=Daboia siamensis OX=343250 PE=1 SV=1	15586	11	2	180.94	25
tr|Q6A3B4|Q6A3B4_VIPAS	Ammodytin I2(B) variant OS=Vipera aspis atra OX=246182 PE=2 SV=1	15283	10	2	177.7	38
tr|Q6A3D9|Q6A3D9_VIPAP	Ammodytin I2(A'') isoform OS=Vipera aspis aspis OX=194601 PE=2 SV=1	15281	10	2	177.7	38
tr|Q6A3B1|Q6A3B1_VIPAA	Ammodytin I2(A') isoform OS=Vipera ammodytes ammodytes OX=8705 PE=2 SV=1	15322	10	2	177.7	38
tr|Q6A3D4|Q6A3D4_VIPAP	Ammodytin I2(A) variant OS=Vipera aspis aspis OX=194601 PE=2 SV=1	15249	10	2	177.7	38
tr|Q6YCN7|Q6YCN7_VIPBB	Ammodytin I2 OS=Vipera berus berus OX=31156 GN=AmtI2 PE=2 SV=1	15309	10	2	177.7	38
tr|Q6A3F2|Q6A3F2_VIPAZ	Ammodytin I2(A) isoform OS=Vipera aspis zinnikeri OX=55427 PE=2 SV=1	15309	10	2	177.7	38
tr|Q6A3F4|Q6A3F4_VIPAP	Ammodytin I2(A) variant OS=Vipera aspis aspis OX=194601 PE=2 SV=1	15279	10	2	177.7	38
tr|Q6A3B9|Q6A3B9_VIPAP	Ammodytin I2(B) variant OS=Vipera aspis aspis OX=194601 PE=2 SV=1	15248	10	2	177.7	38
tr|Q6YCN8|Q6YCN8_VIPAS	Ammodytin I2 OS=Vipera aspis OX=8706 GN=AmtI2 PE=3 SV=1	15309	10	2	177.7	38
tr|Q6A3C0|Q6A3C0_VIPAP	Ammodytin I2(B) isoform OS=Vipera aspis aspis OX=194601 PE=2 SV=1	15282	10	2	177.7	38
tr|Q6A3F0|Q6A3F0_VIPAP	Ammodytin I2(E) isoform OS=Vipera aspis aspis OX=194601 PE=2 SV=1	15319	10	2	177.7	38
tr|Q6YCN9|Q6YCN9_VIPAP	Ammodytin I2 OS=Vipera aspis aspis OX=194601 GN=AmtI2 PE=2 SV=1	15309	10	2	177.7	38
tr|Q6A3D1|Q6A3D1_VIPAP	Ammodytin I2(A) variant OS=Vipera aspis aspis OX=194601 PE=2 SV=1	15323	10	2	177.7	38
tr|Q6A3C9|Q6A3C9_VIPAP	Ammodytin I2(A) variant OS=Vipera aspis aspis OX=194601 PE=2 SV=1	15324	10	2	177.7	38
tr|Q6A3C7|Q6A3C7_VIPAM	Ammodytin I2(A) isoform OS=Vipera ammodytes ruffoi OX=246549 PE=2 SV=1	15309	10	2	177.7	38
tr|Q6A3B5|Q6A3B5_VIPAS	Ammodytin I2(B) isoform OS=Vipera aspis atra OX=246182 PE=2 SV=1	15282	10	2	177.7	38
tr|Q6A3A9|Q6A3A9_VIPAA	Ammodytin I2(A) isoform OS=Vipera ammodytes ammodytes OX=8705 PE=2 SV=1	15309	10	2	177.7	38
tr|Q6A3E3|Q6A3E3_VIPAP	Ammodytin I2(A''') isoform OS=Vipera aspis aspis OX=194601 PE=2 SV=1	15293	10	2	177.7	38
tr|Q6A3E0|Q6A3E0_VIPAP	Ammodytin I2(A) variant OS=Vipera aspis aspis OX=194601 PE=2 SV=1	15325	10	2	177.7	38
tr|Q6A3E7|Q6A3E7_VIPBB	Ammodytin I2(A) variant OS=Vipera berus berus OX=31156 PE=2 SV=1	15297	10	2	177.7	38
tr|A0A6B7FMR4|A0A6B7FMR4_VIPAA	Metalloproteinase of class P-III MPIII-4 OS=Vipera ammodytes ammodytes OX=8705 PE=2 SV=1	68844	11	5	174.55	14
tr|A0A1I9KNR7|A0A1I9KNR7_VIPAA	Disintegrin Dis-1 OS=Vipera ammodytes ammodytes OX=8705 PE=2 SV=1	13997	13	12	170.9	46
tr|A0A1I9KNR4|A0A1I9KNR4_VIPAA	Disintegrin Dis-1 OS=Vipera ammodytes ammodytes OX=8705 PE=2 SV=1	13983	13	12	170.9	46
W8EFS0|V5NTD_MACLB	Snake venom 5'-nucleotidase (Fragment) OS=Macrovipera lebetina OX=8709 PE=1 SV=1	45031	12	3	161.91	25
tr|A0A0H3U209|A0A0H3U209_9SAUR	Phospholipase A2 OS=Ovophis makazayazaya OX=699371 PE=3 SV=1	15629	8	4	159.56	23
P82475|TXVE2_MACLB	Snake venom vascular endothelial growth factor toxin ICPP OS=Macrovipera lebetina OX=8709 PE=1 SV=2	12574	6	6	155.42	35
P0DW97|TXVE_DABPA	Snake venom vascular endothelial growth factor toxin OS=Daboia palaestinae OX=1170828 PE=1 SV=1	12590	6	6	155.42	35
P83942|TXVE_VIPAP	Snake venom vascular endothelial growth factor toxin HF OS=Vipera aspis aspis OX=194601 PE=1 SV=1	12561	6	6	155.42	35
tr|A0A1J0CZM5|A0A1J0CZM5_VIPAA	Vammin-1 OS=Vipera ammodytes ammodytes OX=8705 PE=2 SV=1	16279	6	6	155.42	27
P67863|TXVE_VIPAA	Snake venom vascular endothelial growth factor toxin vammin OS=Vipera ammodytes ammodytes OX=8705 PE=1 SV=2	16307	6	6	155.42	27
tr|A0A6G5ZVU9|A0A6G5ZVU9_VIPAN	Nerve growth factor 1 OS=Vipera anatolica senliki OX=2604287 PE=2 SV=1	27325	8	8	155.35	29
tr|A0A6B7FMQ9|A0A6B7FMQ9_VIPAA	Phospholipase B-like OS=Vipera ammodytes ammodytes OX=8705 PE=2 SV=1	64310	9	9	155.27	15
tr|J3S3W1|J3S3W1_CROAD	Cadam10_SVMPIII-3 OS=Crotalus adamanteus OX=8729 PE=2 SV=1	67329	6	6	155.02	3
tr|J3SDW5|J3SDW5_CROAD	Metalloproteinase (Type III) 1a OS=Crotalus adamanteus OX=8729 PE=2 SV=1	67330	6	6	155.02	3
tr|A0A194ARX9|A0A194ARX9_SISMB	Metalloproteinase type III 10 OS=Sistrurus miliarius barbouri OX=8759 PE=4 SV=1	67425	6	6	155.02	3
tr|A0A194ARK5|A0A194ARK5_SISTE	Metalloproteinase type III 11a OS=Sistrurus tergeminus OX=8757 PE=4 SV=1	67312	6	6	155.02	3
E0Y418|VSP1_MACLB	Serine protease VLSP-1 OS=Macrovipera lebetina OX=8709 PE=2 SV=1	28702	8	6	155.01	23
Q2UXR0|VM3E1_ECHOC	Zinc metalloproteinase-disintegrin-like Eoc1 OS=Echis ocellatus OX=99586 GN=Svmp3-Eoc1 PE=2 SV=1	68751	8	2	149.9	10
P83253|DID1A_MACLB	Disintegrin lebein-1-alpha OS=Macrovipera lebetina OX=8709 PE=1 SV=2	12099	5	3	148.59	40
tr|A0A1I9KNN1|A0A1I9KNN1_VIPAA	C-type lectin snaclec-3 OS=Vipera ammodytes ammodytes OX=8705 PE=2 SV=1	17398	8	2	146.07	27
tr|A0A6G5ZVX7|A0A6G5ZVX7_VIPAN	Serine protease 7 OS=Vipera anatolica senliki OX=2604287 PE=2 SV=1	28928	11	2	142.97	28
A0A1I9KNP0|VSPH1_VIPAA	Vaa serine proteinase homolog 1 OS=Vipera ammodytes ammodytes OX=8705 PE=1 SV=1	28928	11	2	142.97	28
tr|A0A6G5ZW78|A0A6G5ZW78_VIPAN	Serine protease 2 OS=Vipera anatolica senliki OX=2604287 PE=2 SV=1	28103	9	6	140.81	21
tr|A0A1J0CZM7|A0A1J0CZM7_VIPAA	Snaclec-7 OS=Vipera ammodytes ammodytes OX=8705 PE=2 SV=1	17285	6	3	140.2	32
B4XT06|SLB7_MACLB	Snaclec B7 (Fragment) OS=Macrovipera lebetina OX=8709 PE=2 SV=1	15036	7	5	131.63	26
tr|A0A1L8D689|A0A1L8D689_BOTAT	Snake venom metalloproteinase OS=Bothrops atrox OX=8725 PE=2 SV=1	67598	5	4	121.72	11
Q9YGJ7|PA2A8_DABPA	Acidic phospholipase A2 VP8 OS=Daboia palaestinae OX=1170828 PE=3 SV=1	15350	6	2	120.97	33
B4XSY8|SLAD_MACLB	Snaclec A13 OS=Macrovipera lebetina OX=8709 PE=2 SV=1	15308	5	3	115.89	33
B4XSY7|SLAC_MACLB	Snaclec A12 OS=Macrovipera lebetina OX=8709 PE=2 SV=1	17717	5	3	115.89	28
B4XSZ1|SLAG_MACLB	Snaclec A16 OS=Macrovipera lebetina OX=8709 PE=2 SV=1	17778	5	3	115.89	27
tr|A0A1I9KNL5|A0A1I9KNL5_VIPAA	Serine proteinase SP-2 OS=Vipera ammodytes ammodytes OX=8705 PE=2 SV=1	28885	8	5	112.99	22
tr|A0A0B8RNS9|A0A0B8RNS9_BOIIR	Xaa-Pro aminopeptidase 2 OS=Boiga irregularis OX=92519 PE=3 SV=1	76736	5	5	112.87	6
tr|A0A1I9KNR6|A0A1I9KNR6_VIPAA	Metalloproteinase of class P-III MPIII-1 OS=Vipera ammodytes ammodytes OX=8705 PE=2 SV=1	68388	7	2	112.36	7
tr|E9JGC2|E9JGC2_ECHPL	Metalloproteinase (Fragment) OS=Echis pyramidum leakeyi OX=38415 PE=2 SV=1	56995	3	2	104.9	5
tr|E9JGC3|E9JGC3_ECHPL	Metalloproteinase (Fragment) OS=Echis pyramidum leakeyi OX=38415 PE=2 SV=1	48401	3	2	104.9	6
tr|A0A1I9KNP1|A0A1I9KNP1_VIPAA	C-type lectin snaclec-4 OS=Vipera ammodytes ammodytes OX=8705 PE=2 SV=1	17505	4	2	101.73	24
C0HKZ6|SLMA_MACLB	Snaclec macrovipecetin subunit alpha OS=Macrovipera lebetina OX=8709 PE=1 SV=1	15418	4	2	97.65	31
U5PZ28|VM2H1_BOTLA	Zinc metalloproteinase-disintegrin BlatH1 OS=Bothriechis lateralis OX=44727 PE=1 SV=1	54298	3	2	96.63	6
P0DJL4|SLA_DABPA	Snaclec VP12 subunit A (Fragment) OS=Daboia palaestinae OX=1170828 PE=1 SV=1	12125	3	3	96.24	24
tr|E9JG79|E9JG79_ECHCO	Metalloproteinase OS=Echis coloratus OX=64175 PE=2 SV=1	69563	5	2	96.06	9
tr|E9JG90|E9JG90_ECHCO	Metalloproteinase OS=Echis coloratus OX=64175 PE=2 SV=1	69825	5	2	96.06	9
Q7ZT98|CRVP_OPHHA	Cysteine-rich venom protein ophanin OS=Ophiophagus hannah OX=8665 PE=1 SV=1	26869	3	3	95.05	5
tr|V8N8B4|V8N8B4_OPHHA	ShKT domain-containing protein OS=Ophiophagus hannah OX=8665 GN=L345_16118 PE=3 SV=1	24779	3	3	95.05	5
tr|C1JZW4|C1JZW4_OPHHA	Opharin OS=Ophiophagus hannah OX=8665 PE=2 SV=1	26305	3	3	95.05	5
Q8AVA3|CRVP_PSEPO	Cysteine-rich venom protein pseudecin OS=Pseudechis porphyriacus OX=8671 PE=1 SV=1	26452	3	3	95.05	5
Q8AVA4|CRVP_PSEAU	Cysteine-rich venom protein pseudechetoxin OS=Pseudechis australis OX=8670 PE=1 SV=1	26475	3	3	95.05	5
tr|A0A1D8BAX5|A0A1D8BAX5_PSEPP	Cysteine-rich secretory protein OS=Pseudechis papuanus OX=61265 GN=CRiSP1 PE=2 SV=1	26459	3	3	95.05	5
A6MFK9|CRVP_DEMVE	Cysteine-rich venom protein OS=Demansia vestigiata OX=412038 PE=2 SV=1	26470	3	3	95.05	5
tr|T2HS00|T2HS00_PROFL	Prosaposin OS=Protobothrops flavoviridis OX=88087 PE=2 SV=1	58564	5	5	94.92	9
tr|A0A346CM44|A0A346CM44_9SAUR	Metalloproteinase 17 (Fragment) OS=Ahaetulla prasina OX=499056 PE=2 SV=1	68144	3	2	91.16	5
tr|A0A346CM27|A0A346CM27_9SAUR	Metalloproteinase 35 (Fragment) OS=Ahaetulla prasina OX=499056 PE=2 SV=1	68041	3	2	91.16	5
tr|A0A346CM41|A0A346CM41_9SAUR	Metalloproteinase 37 (Fragment) OS=Ahaetulla prasina OX=499056 PE=2 SV=1	68148	3	2	91.16	5
tr|A0A346CM32|A0A346CM32_9SAUR	Metalloproteinase 22 (Fragment) OS=Ahaetulla prasina OX=499056 PE=2 SV=1	68152	3	2	91.16	5
tr|R4G317|R4G317_9SAUR	KP-Pse-7 OS=Pseudonaja modesta OX=340912 PE=2 SV=1	9171	2	2	89.11	18
tr|R4FK61|R4FK61_9SAUR	KP-Pse-5 OS=Pseudonaja modesta OX=340912 PE=2 SV=1	9212	2	2	89.11	18
Q90W98|VKT4_PSETT	Kunitz-type serine protease inhibitor textilinin-4 OS=Pseudonaja textilis textilis OX=169397 PE=2 SV=1	8983	2	2	89.11	18
tr|E9JG53|E9JG53_ECHCS	Metalloproteinase (Fragment) OS=Echis carinatus sochureki OX=124223 PE=2 SV=1	27821	3	3	87.73	6
tr|E9JG44|E9JG44_ECHCS	Metalloproteinase (Fragment) OS=Echis carinatus sochureki OX=124223 PE=2 SV=1	29963	3	3	87.73	6
tr|V8P5W4|V8P5W4_OPHHA	Putative serine carboxypeptidase CPVL OS=Ophiophagus hannah OX=8665 GN=CPVL PE=3 SV=1	48962	3	3	81.67	8
tr|A0A1W7RI96|A0A1W7RI96_AGKCO	Putative serine carboxypeptidase CPVL-like protein OS=Agkistrodon contortrix contortrix OX=8713 PE=3 SV=1	55517	3	3	81.67	7
tr|J3SE72|J3SE72_CROAD	Putative serine carboxypeptidase CPVL-like OS=Crotalus adamanteus OX=8729 PE=2 SV=1	55591	3	3	81.67	7
tr|T1DNE0|T1DNE0_CROHD	Putative serine carboxypeptidase CPVL-like protein OS=Crotalus horridus OX=35024 PE=2 SV=1	55505	3	3	81.67	7
tr|A0A0K8S1F1|A0A0K8S1F1_CROHD	Putative serine carboxypeptidase CPVL-like protein OS=Crotalus horridus OX=35024 PE=3 SV=1	55483	3	3	81.67	7
tr|K9JBU4|K9JBU4_DABSI	p68 beta subunit OS=Daboia siamensis OX=343250 PE=2 SV=1	16910	3	2	80.84	22
tr|K9JCR4|K9JCR4_DABRR	p68 beta subunit OS=Daboia russelii limitis OX=338883 PE=2 SV=1	16910	3	2	80.84	22
tr|M9NCD2|M9NCD2_CERGO	Glutaminyl-peptide cyclotransferase OS=Cerrophidion godmani OX=44722 GN=QC-1 PE=2 SV=1	40415	3	3	77.67	7
tr|U3TBM3|U3TBM3_OVOOK	Glutaminyl-peptide cyclotransferase (Fragment) OS=Ovophis okinavensis OX=8769 PE=2 SV=1	40742	3	3	77.67	7
tr|M9NCI9|M9NCI9_TRIGS	Glutaminyl-peptide cyclotransferase OS=Trimeresurus gracilis OX=109781 GN=QC PE=2 SV=1	42295	3	3	77.67	7
tr|M9NCI8|M9NCI8_CROAT	Glutaminyl-peptide cyclotransferase OS=Crotalus atrox OX=8730 GN=QC PE=2 SV=1	42299	3	3	77.67	7
tr|J3S3V2|J3S3V2_CROAD	Glutaminyl-peptide cyclotransferase OS=Crotalus adamanteus OX=8729 PE=2 SV=1	42354	3	3	77.67	7
tr|A0A1W7RH88|A0A1W7RH88_AGKCO	Glutaminyl-peptide cyclotransferase OS=Agkistrodon contortrix contortrix OX=8713 PE=3 SV=1	42352	3	3	77.67	7
tr|A0A0K8S0L7|A0A0K8S0L7_CROHD	Glutaminyl-peptide cyclotransferase OS=Crotalus horridus OX=35024 PE=3 SV=1	42370	3	3	77.67	7
tr|A0A098LZZ5|A0A098LZZ5_9SAUR	Glutaminyl-peptide cyclotransferase OS=Hypsiglena sp. JMG-2014 OX=1550645 PE=3 SV=1	42028	3	3	77.67	7
Q90YA8|QPCT_GLOBL	Glutaminyl-peptide cyclotransferase OS=Gloydius blomhoffii OX=242054 GN=QPCT PE=2 SV=1	42267	3	3	77.67	7
tr|T1DH29|T1DH29_CROHD	Glutaminyl-peptide cyclotransferase OS=Crotalus horridus OX=35024 PE=2 SV=1	42369	3	3	77.67	7
tr|M9NCD3|M9NCD3_SISTE	Glutaminyl-peptide cyclotransferase OS=Sistrurus tergeminus OX=8757 GN=QC PE=2 SV=1	42297	3	3	77.67	7
tr|U3TDL2|U3TDL2_OVOOK	Glutaminyl-peptide cyclotransferase (Fragment) OS=Ovophis okinavensis OX=8769 PE=2 SV=1	42400	3	3	77.67	7
tr|U3FZH0|U3FZH0_MICFL	Glutaminyl-peptide cyclotransferase OS=Micrurus fulvius OX=8637 PE=2 SV=1	42150	3	3	77.67	7
Q9YIB5|QPCT_BOTJA	Glutaminyl-peptide cyclotransferase OS=Bothrops jararaca OX=8724 GN=QPCT PE=2 SV=1	42204	3	3	77.67	7
P0CV92|QPCT_CROAT	Glutaminyl-peptide cyclotransferase (Fragment) OS=Crotalus atrox OX=8730 GN=QPCT PE=1 SV=1	7899	3	3	77.67	34
tr|K9JDF6|K9JDF6_DABSI	p31 beta subunit OS=Daboia siamensis OX=343250 PE=2 SV=1	17338	2	2	72.68	12
tr|K9JBV3|K9JBV3_DABRR	p31 beta subunit OS=Daboia russelii limitis OX=338883 PE=2 SV=1	17252	2	2	72.68	12
tr|K9JDK6|K9JDK6_DABRR	p31 beta subunit OS=Daboia russelii russelii OX=31159 PE=2 SV=1	17378	2	2	72.68	12
tr|A0A1J0CZM4|A0A1J0CZM4_VIPAA	Snaclec-5 OS=Vipera ammodytes ammodytes OX=8705 PE=2 SV=1	18101	2	2	69.71	12
tr|A0A1J0CZM8|A0A1J0CZM8_VIPAA	Snaclec-6 OS=Vipera ammodytes ammodytes OX=8705 PE=2 SV=1	18052	2	2	69.71	12
tr|W8EEP5|W8EEP5_MACLB	Hyaluronidase (Fragment) OS=Macrovipera lebetina OX=8709 PE=2 SV=1	40873	2	2	68	6
A3QVN6|HYAL_ECHPL	Hyaluronidase OS=Echis pyramidum leakeyi OX=38415 PE=2 SV=1	52688	2	2	68	4
A3QVN3|HYAL1_CERCE	Hyaluronidase-1 OS=Cerastes cerastes OX=8697 PE=2 SV=1	52654	2	2	68	4
A3QVN5|HYAL4_CERCE	Hyaluronidase-4 OS=Cerastes cerastes OX=8697 PE=2 SV=1	52622	2	2	68	4
A3QVN4|HYAL3_CERCE	Hyaluronidase-3 OS=Cerastes cerastes OX=8697 PE=2 SV=1	52616	2	2	68	4
tr|A0A2D4G9B5|A0A2D4G9B5_MICCO	C-type lectin domain-containing protein (Fragment) OS=Micrurus corallinus OX=54390 PE=3 SV=1	11772	2	2	54.12	10

[truncated: 3 more sheets: M. raddei_MELD, M. lebetina_Trypsin, M.lebetina_MELD]
